# Supplementary material for: Direct prediction of antimicrobial resistance in Pseudomonas aeruginosa by metagenomic next-generation sequencing
Source: Front Microbiol. 2024 Jun 6;15:1413434. doi: 10.3389/fmicb.2024.1413434 (PMC11187003; doi:10.3389/fmicb.2024.1413434)
Supplement: SUPPLEMENTARY TABLE S1 — Detailed information of P. aeruginosa included in this study. [file Table_1.XLSX]

## Sheet: Table S1
Table S1. Detailed information of P. aeruginosa included in this study
GenBank ID	Total-Length (bp)	contig-count	N50 Length (bp)	Sequence GC%	CDS
GCA_033796495.1	6885704	67	249818	66	6347
GCA_033796595.1	6882881	87	294069	66	6401
GCA_033796705.1	6888953	60	492618	66	6445
GCA_033796805.1	6537219	51	359375	66.5	5985
GCA_033796825.1	6391395	45	476594	66.5	5897
GCA_033796905.1	6638936	33	465427	66	6102
GCA_033796925.1	6429914	34	464402	66.5	5855
GCA_033797005.1	7243625	54	682761	66	6642
GCA_033797125.1	6421342	64	331378	66.5	5857
GCA_033797225.1	6178778	26	459901	66.5	5631
GCA_033797325.1	6660770	45	496409	66.5	6068
GCA_033797455.1	6744974	68	210000	66.5	6214
GCA_033797635.1	6948239	84	273327	66	6443
GCA_033797365.1	6362962	48	485162	66.5	5799
GCA_033797805.1	6245819	42	294262	66.5	5698
GCA_033797885.1	6526190	65	210171	66.5	5977
GCA_033798015.1	6235834	36	334490	66.5	5698
GCA_033798045.1	6631872	60	202671	66	6110
GCA_033798105.1	6745112	78	234410	66	6215
GCA_033798125.1	6691576	63	295067	66	6119
GCA_033798185.1	6441273	42	319869	66.5	5924
GCA_033798225.1	6294854	34	449402	66.5	5734
GCA_033798325.1	6366166	30	368369	66.5	5819
GCA_033798395.1	6376742	35	386740	66.5	5831
GCA_033796485.1	6860001	65	262255	66	6273
GCA_033796585.1	6301644	47	427219	66.5	5752
GCA_033796675.1	7274890	100	247924	65.5	6880
GCA_033796775.1	6887435	68	243958	66	6344
GCA_033796885.1	6562100	53	425568	66	5990
GCA_033796975.1	6677607	51	269780	66	6133
GCA_033797025.1	7110378	70	296685	66	6572
GCA_033797075.1	6453303	29	452647	66.5	5935
GCA_033797105.1	6575980	47	305387	66	6039
GCA_033797145.1	6863419	77	291049	66	6314
GCA_033797175.1	7018885	58	309922	66	6593
GCA_033797285.1	6371906	40	424120	66.5	5803
GCA_033797435.1	6460376	56	409907	66.5	5940
GCA_033797535.1	6360731	40	363009	66.5	5842
GCA_033797615.1	6546823	67	286366	66	5991
GCA_033797695.1	6710818	40	312671	66	6226
GCA_033797785.1	6925512	92	207403	66	6339
GCA_033797985.1	7186564	68	319265	65.5	6734
GCA_033798285.1	6925251	64	237837	66	6503
GCA_033798385.1	6433996	45	317191	66.5	5866
GCA_033796525.1	6341837	27	675481	66.5	5811
GCA_033796545.1	6377864	47	379821	66.5	5821
GCA_033796625.1	6933899	53	489495	66	6507
GCA_033796645.1	6394290	51	395605	66.5	5829
GCA_033796665.1	6386020	60	453133	66.5	5831
GCA_033796725.1	6729165	61	300965	66	6173
GCA_033796745.1	6850270	105	231602	66	6305
GCA_033796845.1	6402231	45	577614	66.5	5807
GCA_033796945.1	6908765	35	393300	66	6383
GCA_033797035.1	6312757	43	510762	66.5	5801
GCA_033797155.1	6411243	56	261745	66.5	5845
GCA_033797165.1	6628219	43	381652	66	6038
GCA_033797245.1	7468568	94	166721	65.5	7032
GCA_033797275.1	6650708	57	313582	66	6082
GCA_033797345.1	7075146	71	265475	65.5	6622
GCA_033797475.1	6286336	40	427084	66.5	5744
GCA_033797555.1	6493127	61	278759	66.5	5934
GCA_033797655.1	6978484	80	199021	65.5	6515
GCA_033797675.1	6299918	49	299567	66.5	5728
GCA_033797385.1	6659228	58	237830	66	6056
GCA_033797375.1	6755771	56	301839	66	6147
GCA_033797745.1	6635765	52	269325	66.5	6053
GCA_033797825.1	6300533	44	281886	66.5	5722
GCA_033797845.1	7197006	98	252417	65.5	6772
GCA_033797925.1	6501673	49	265366	66.5	5947
GCA_033797945.1	6495655	65	241896	66.5	5949
GCA_033798085.1	6426993	43	354511	66.5	5893
GCA_033798145.1	6394757	48	408389	66.5	5821
GCA_033798245.1	6644471	54	269622	66	6076
GCA_033798345.1	6844620	82	210324	66	6336
GCA_033798445.1	7003147	74	237547	66	6487
GCA_033796445.1	6497255	47	428265	66.5	5942
GCA_033796565.1	6934830	55	489495	66	6511
GCA_033796765.1	6724757	57	329157	66	6156
GCA_033796865.1	7044429	62	320462	66	6484
GCA_033796965.1	6460561	43	473984	66.5	5939
GCA_033797065.1	6352864	24	504801	66.5	5822
GCA_033797265.1	6424170	41	474571	66.5	5813
GCA_033797395.1	6452114	32	415316	66.5	5908
GCA_033797415.1	6381813	51	411339	66.5	5831
GCA_033797495.1	7096100	73	255325	66	6646
GCA_033797515.1	6514907	58	358915	66.5	5972
GCA_033797575.1	7032531	131	164991	66	6531
GCA_033797595.1	6695339	61	258595	66	6120
GCA_033797765.1	5968530	22	445555	66.5	5399
GCA_033797865.1	7067699	66	220085	65.5	6597
GCA_033797905.1	6610970	51	283116	66	6059
GCA_033797965.1	6413146	47	416916	66.5	5901
GCA_033798005.1	6288360	31	393543	66.5	5765
GCA_033798065.1	6919409	54	293560	66	6458
GCA_033798165.1	6573328	65	226763	66.5	5955
GCA_033798205.1	7307062	113	223913	65.5	6877
GCA_033798265.1	6535959	66	235783	66	5933
GCA_033798305.1	6323100	60	298830	66.5	5726
GCA_033798365.1	6373432	47	452641	66.5	5807
GCA_033798425.1	6469518	47	294921	66.5	5943
GCA_000710625.1	6391538	31	521325	66.5	5708
GCA_000937495.2	6933068	100	261302	66	6454
GCA_000937465.2	6730817	96	232106	66	6165
GCA_001874975.1	6929574	12	4354749	66	6414
GCA_001874805.1	6963676	1	6963676	66	6380
GCA_001874955.1	6773465	219	93808	66	6545
GCA_001875165.1	7267705	9	2172972	66	6763
GCA_001875215.1	6971125	3	6879367	66	6372
GCA_001875185.1	6827144	16	809436	66	6298
GCA_001875205.1	6882581	5	2533928	66	6249
GCA_001874795.1	6900175	3	5781139	66	6323
GCA_001874995.1	6425652	6	2300470	66	5871
GCA_002968585.1	6747010	1	6747010	66	6356
GCA_002968655.1	7282236	2	7240677	65.5	7049
GCA_002968955.1	7162784	1	7162784	66	6882
GCA_003000655.1	7172470	1	7172470	66	6967
GCA_002968515.1	6463575	1	6463575	66.5	6090
GCA_003000795.1	6611054	4	6565899	66	6257
GCA_003073795.1	7267567	1	7267567	66	7089
GCA_002968695.1	7086054	3	7012922	66	6762
GCA_003000755.1	7284124	5	5519119	65.5	7124
GCA_002997005.1	6822666	1	6822666	66	6300
GCA_003073895.1	7578039	3	7139518	65.5	7259
GCA_003074115.1	6776714	1	6776614	66	6455
GCA_003000695.1	6940345	3	6935329	66	6661
GCA_003073615.1	6853499	1	6853499	66	6493
GCA_003073735.1	7125975	1	7125975	66	6849
GCA_003074095.1	7167215	1	7167115	66	6982
GCA_003194245.1	6859232	1	6859232	66	6418
GCA_003260415.1	7178792	2	7141746	66	6919
GCA_003204335.1	6799785	1	6799785	66	6321
GCA_003288335.1	6303875	1	6303875	66.5	5938
GCA_003288435.1	6685102	1	6685102	66	6327
GCA_003193645.1	6475581	1	6475581	66.5	6196
GCA_003324255.1	6752712	1	6752712	66	6428
GCA_003324465.1	6418505	1	6418505	66.5	6001
GCA_003324275.1	7381251	2	7020885	65.5	7164
GCA_003324295.1	7079305	1	7079305	66	6839
GCA_003324385.1	6792240	6	6223626	66	6604
GCA_003324405.1	7226502	2	7079170	65.5	6923
GCA_003288355.1	6540996	1	6540996	66	6312
GCA_003571805.1	7075653	2	6946231	66	6626
GCA_003968015.1	7356800	315	56442	65.5	7128
GCA_003968025.1	7064713	329	66940	65.5	6810
GCA_003968155.1	7161217	135	225150	65.5	6719
GCA_003968165.1	6782774	127	254942	66	6421
GCA_003968235.1	6769662	113	214961	66	6403
GCA_003968275.1	6444919	54	349442	66.5	6058
GCA_003968295.1	6751302	150	226451	66	6388
GCA_003968305.1	6475204	124	226413	66.5	6069
GCA_003968375.1	6696919	58	398254	66	6360
GCA_003968425.1	7146707	192	127544	65.5	6826
GCA_003968525.1	6298064	67	349848	66.5	5875
GCA_003968625.1	6270751	124	167096	66.5	5905
GCA_003969065.1	6494873	186	91103	66.5	6180
GCA_003969295.1	6776946	71	266594	66	6385
GCA_003969405.1	6780137	171	90286	66	6452
GCA_003969485.1	6780257	203	88885	66	6438
GCA_003969495.1	6508561	204	71024	66	6212
GCA_003969565.1	6293739	69	280447	66.5	5876
GCA_003969575.1	6382502	186	88859	66.5	6047
GCA_003969615.1	6430277	149	125440	66.5	5914
GCA_003969645.1	6635285	140	133947	66	6284
GCA_003969725.1	6506983	88	429269	66	6141
GCA_003969795.1	6408848	238	64051	66.5	6049
GCA_003969965.1	6323478	48	427829	66.5	5919
GCA_003970635.1	6991711	244	70915	66	6677
GCA_003970615.1	6935556	217	89392	66	6600
GCA_003977935.1	7032738	129	172201	66	6661
GCA_003977945.1	6296953	192	76195	66.5	5944
GCA_003977995.1	6349621	69	310910	66.5	5965
GCA_003978035.1	6268481	38	498224	66.5	5860
GCA_003968135.1	6235816	55	349927	66.5	5787
GCA_003968225.1	6725073	151	134105	66	6385
GCA_003968325.1	6393241	132	104068	66.5	6040
GCA_003968495.1	6828028	250	71187	66	6482
GCA_003968385.1	6265327	179	85940	66.5	5890
GCA_003968585.1	6260875	50	510162	66.5	5840
GCA_003968395.1	6191883	113	126752	66.5	5667
GCA_003969175.1	7052906	317	82995	66	6826
GCA_003969195.1	6573139	69	377739	66	6190
GCA_003969265.1	6370604	120	149418	66.5	5966
GCA_003969365.1	6333273	177	86231	66.5	5978
GCA_003969475.1	7171428	122	199808	66	6780
GCA_003969555.1	6812488	248	164830	66	6408
GCA_003969655.1	6494310	90	251324	66.5	6079
GCA_003969695.1	7031489	151	171553	66	6682
GCA_003969735.1	6594082	63	310954	66	6284
GCA_003969785.1	6339603	65	333414	66.5	5964
GCA_003969875.1	6869499	258	73274	66	6545
GCA_003969885.1	6501460	195	86128	66.5	6074
GCA_003969975.1	5912421	38	466471	66.5	5493
GCA_003977915.1	6316238	189	78866	66.5	5966
GCA_003977965.1	6191380	144	115414	66.5	5843
GCA_003968035.1	6734108	57	427707	66	6343
GCA_003968055.1	6986301	132	195309	65.5	6656
GCA_003968115.1	6420453	57	439074	66.5	5998
GCA_003968215.1	6910198	413	71471	66	6798
GCA_003968445.1	6861353	300	61923	66	6602
GCA_003968535.1	6439859	223	68381	66.5	6170
GCA_003968615.1	6509751	299	60269	66	6163
GCA_003969075.1	6346725	185	90288	66.5	6002
GCA_003969095.1	7025487	253	70910	66	6725
GCA_003969105.1	6717057	290	93253	66	6480
GCA_003969165.1	7049219	96	329246	66	6613
GCA_003969225.1	6344431	67	364598	66.5	5947
GCA_003969315.1	6606996	74	301514	66	6235
GCA_003969305.1	6670940	186	86803	66	6318
GCA_003969415.1	6411494	211	76857	66.5	6097
GCA_003969535.1	6487691	129	134267	66.5	6105
GCA_003969635.1	7130564	141	182080	66	6740
GCA_003969825.1	6555630	224	71060	66	6178
GCA_003969915.1	6528585	212	75484	66.5	6223
GCA_003969955.1	6893110	212	81032	66	6551
GCA_003969985.1	6232278	213	78515	66.5	5893
GCA_003970625.1	6711313	224	70277	66	6349
GCA_003977955.1	6394452	71	279306	66.5	5953
GCA_003968045.1	6575059	223	65419	66.5	6265
GCA_003968125.1	6907900	96	239914	65.5	6540
GCA_003968315.1	6821230	95	293674	66	6455
GCA_003968565.1	6363888	161	130143	66	5999
GCA_003968895.1	6473360	52	426480	66.5	5982
GCA_003968935.1	6149846	42	438071	66.5	5716
GCA_003968955.1	6985982	75	428042	66	6569
GCA_003968985.1	6375161	52	481330	66.5	5942
GCA_003969035.1	6845305	72	260789	66	6472
GCA_003969055.1	6843047	275	63809	66	6569
GCA_003969155.1	6674435	260	82219	66	6392
GCA_003969255.1	6738933	165	96559	66	6428
GCA_003969355.1	6302224	56	457392	66.5	5881
GCA_003969395.1	6276349	47	640705	66.5	5840
GCA_003969445.1	6463376	222	63396	66.5	6103
GCA_003969715.1	6318735	220	73892	66.5	5973
GCA_003969775.1	6547438	207	63834	66	6251
GCA_003969855.1	6756810	236	86073	66	6375
GCA_003969865.1	6301640	56	295453	66.5	5865
GCA_003970005.1	6340159	194	77292	66.5	6012
GCA_003970055.1	6650291	78	314280	66	6253
GCA_003970065.1	6876949	277	70213	66	6625
GCA_003977895.1	6486368	98	328812	66	6229
GCA_007567125.1	6382154	756	21769	66.5	6107
GCA_007567285.1	6267146	1798	7110	66.5	6124
GCA_007566955.1	6185611	794	14558	66.5	5829
GCA_016905405.1	7091263	61	659943	66	6617
GCA_019740495.1	6962906	88	288330	66	6416
GCA_019915485.1	7124329	1	7124329	66	6638
GCA_019915465.1	7173620	1	7173620	66	6649
GCA_019915445.1	7093992	1	7093992	66	6586
GCA_021245785.1	7036708	114	201671	65.5	6593
GCA_021245865.1	7043392	100	228349	65.5	6595
GCA_021712655.1	6933816	182	86700	66	6436
GCA_021712755.1	6688663	111	157587	66	6087
GCA_021712855.1	6500075	217	75449	66.5	6038
GCA_021712895.1	6445347	384	33139	66	6190
GCA_021712955.1	6742269	148	106607	66.5	6224
GCA_021712675.1	6451560	189	84424	66.5	5902
GCA_021712775.1	6469009	97	171419	66.5	5808
GCA_021712875.1	6489119	157	90449	66.5	6009
GCA_021712935.1	6880678	172	88484	66.5	6398
GCA_021712735.1	6712749	184	99282	66	6200
GCA_021712795.1	6830130	142	114965	66	6301
GCA_021712815.1	6906837	107	168982	66	6376
GCA_021712835.1	6424133	154	95757	66.5	5915
GCA_022966415.1	6292974	80	173856	66.5	5740
GCA_022966515.1	6785455	103	159898	66	6225
GCA_022967415.1	7038667	142	138556	66	6449
GCA_022967435.1	6833849	121	202621	66.5	6413
GCA_022966455.1	6818894	160	122059	66	6284
GCA_022966435.1	6416747	92	181785	66.5	5906
GCA_024715505.1	6717930	185	101589	66	6295
GCA_024715635.1	6718410	232	60338	66	6298
GCA_024715735.1	6774269	219	80419	66	6365
GCA_024715915.1	6716860	217	85712	66	6290
GCA_024716035.1	6719576	237	72362	66	6311
GCA_024716135.1	6717278	222	88438	66	6298
GCA_024716225.1	6719576	227	74332	66	6297
GCA_024716295.1	6711755	181	114778	66	6280
GCA_024716335.1	6935610	211	93885	66	6482
GCA_024716435.1	6775546	236	73292	66	6359
GCA_024716455.1	6930507	245	84362	66	6500
GCA_024716525.1	6935881	233	68756	66	6510
GCA_024716555.1	6933433	242	73291	66	6495
GCA_024716645.1	6935096	290	52490	66	6525
GCA_024716755.1	6718746	231	80741	66	6300
GCA_024716855.1	6716907	215	86321	66	6300
GCA_024716935.1	6717793	205	89352	66	6295
GCA_024717155.1	6935483	206	103237	66	6496
GCA_024717255.1	6933694	212	93303	66	6486
GCA_024717375.1	6961051	80	231130	66	6425
GCA_024717435.1	6931992	200	93318	66	6479
GCA_024718695.1	6932471	212	91752	66	6485
GCA_024718795.1	6939121	208	88792	66	6486
GCA_024718815.1	6932709	221	84362	66	6490
GCA_024718885.1	6942591	220	84365	66	6500
GCA_024718935.1	6936983	229	78189	66	6502
GCA_024719005.1	6935006	225	91679	66	6503
GCA_024719045.1	6777326	246	59799	66	6351
GCA_024719575.1	6933030	212	88471	66	6490
GCA_024720035.1	6934536	224	82956	66	6498
GCA_024720135.1	6932472	220	91748	66	6493
GCA_024720355.1	6913714	192	136531	66	6466
GCA_024720555.1	6933726	233	88639	66	6503
GCA_024720595.1	6927791	179	119166	66	6467
GCA_024720655.1	6934362	209	87772	66	6486
GCA_024714535.1	6880433	160	139603	66	6362
GCA_024714635.1	6935996	169	126492	66	6453
GCA_024714715.1	6969918	85	248486	66	6432
GCA_024714755.1	6932660	219	91748	66	6507
GCA_024714815.1	6717726	227	63718	66	6287
GCA_024714845.1	6717772	188	89386	66	6281
GCA_024714915.1	6720650	197	82953	66	6272
GCA_024715015.1	6740670	89	230138	66	6246
GCA_024715115.1	6813815	216	67531	66	6345
GCA_024715135.1	6934628	222	84464	66	6496
GCA_024715215.1	6934774	216	85556	66	6499
GCA_024715315.1	6774425	188	91632	66	6337
GCA_024715355.1	6792167	183	99950	66	6349
GCA_024715425.1	6772859	211	101353	66	6354
GCA_024719735.1	6932541	220	90424	66	6495
GCA_024719775.1	6911262	192	112649	66	6457
GCA_024719845.1	6915601	208	90689	66	6482
GCA_024719875.1	6916367	224	90363	66	6483
GCA_024719935.1	6932991	206	86910	66	6484
GCA_024719975.1	6913336	200	104252	66	6472
GCA_024720065.1	6915712	211	77942	66	6470
GCA_024720165.1	6931153	229	84109	66	6491
GCA_024720275.1	6933992	228	83221	66	6504
GCA_024720475.1	6930598	222	79786	66	6490
GCA_024720515.1	6931929	196	104904	66	6474
GCA_024720715.1	6937907	219	86517	66	6493
GCA_024714735.1	6840362	217	94298	66	6414
GCA_024714835.1	6718963	189	79492	66	6265
GCA_024714935.1	6720092	163	155193	66	6267
GCA_024714975.1	6939112	185	108887	66	6487
GCA_024715035.1	6839379	78	247251	66	6302
GCA_024715055.1	6965860	89	223921	66	6432
GCA_024715145.1	6790864	220	86321	66	6369
GCA_024715195.1	6738252	208	82047	66	6296
GCA_024715255.1	6715343	211	88436	66	6298
GCA_024715455.1	6938632	200	88613	66	6493
GCA_024715555.1	6936253	245	66772	66	6509
GCA_024715655.1	6938903	227	84387	66	6505
GCA_024715725.1	6934780	218	92026	66	6502
GCA_024715845.1	6745987	230	70726	66	6316
GCA_024715925.1	6720804	219	88474	66	6294
GCA_024716055.1	6720215	211	89837	66	6288
GCA_024716075.1	6722624	239	79355	66	6314
GCA_024716155.1	6941517	242	66784	66	6500
GCA_024716175.1	6717389	236	69663	66	6297
GCA_024716255.1	6715380	224	82559	66	6295
GCA_024716275.1	6717498	237	66783	66	6273
GCA_024716375.1	6932124	251	68365	66	6516
GCA_024716475.1	6933657	228	78686	66	6492
GCA_024716575.1	6935035	228	74322	66	6494
GCA_024716655.1	6934390	290	60091	66	6536
GCA_024716765.1	6744765	221	88256	66	6308
GCA_024716815.1	6934576	197	110033	66	6480
GCA_024716875.1	6775129	224	90037	66	6350
GCA_024716975.1	6713544	176	104689	66	6286
GCA_024717075.1	6769108	209	88454	66	6344
GCA_024717125.1	6931685	215	93335	66	6492
GCA_024717175.1	6929252	205	95646	66	6483
GCA_024717285.1	6719279	213	94293	66	6308
GCA_024717415.1	6930159	204	93302	66	6491
GCA_024718625.1	6937786	228	79813	66	6505
GCA_024718715.1	6936292	229	84674	66	6502
GCA_024718735.1	6818358	318	87876	66	6452
GCA_024718835.1	7362537	263	82935	65.5	6988
GCA_024719405.1	6935403	247	66778	66	6505
GCA_024719455.1	6932694	192	95646	66	6479
GCA_024719655.1	6930655	207	94280	66	6486
GCA_024714515.1	6936900	162	155193	66	6455
GCA_024714555.1	6879198	163	136838	66	6371
GCA_024714615.1	6933986	169	147066	66	6458
GCA_024714655.1	6933294	163	102005	66	6441
GCA_024714795.1	6715541	200	91643	66	6245
GCA_024714895.1	6720525	208	79095	66	6285
GCA_024714985.1	6964625	87	197874	66	6426
GCA_024715095.1	6962357	98	185971	66	6438
GCA_024715295.1	6776948	186	104107	66	6337
GCA_024715395.1	6934637	198	97756	66	6488
GCA_024715495.1	6936591	232	72255	66	6496
GCA_024715575.1	6774673	234	63814	66	6356
GCA_024715615.1	6933282	211	86893	66	6472
GCA_024715815.1	6866789	225	80242	66	6452
GCA_024716015.1	6719443	219	85959	66	6296
GCA_024716115.1	6716602	220	68270	66	6281
GCA_024716215.1	6941909	244	59340	66	6511
GCA_024716305.1	6716862	215	79788	66	6281
GCA_024716355.1	6938352	193	100135	66	6489
GCA_024716395.1	6738650	193	105086	66	6309
GCA_024716515.1	6742973	242	68904	66	6307
GCA_024716635.1	6940250	242	71736	66	6517
GCA_024716685.1	6930175	257	65678	66	6501
GCA_024716735.1	6718034	224	74460	66	6294
GCA_024716825.1	6770102	279	89831	66	6348
GCA_024717015.1	6718479	218	74511	66	6296
GCA_024717065.1	6941787	216	91640	66	6504
GCA_024717115.1	6932740	186	123331	66	6477
GCA_024717235.1	6937660	231	80369	66	6507
GCA_024717345.1	6931682	213	80871	66	6497
GCA_024718565.1	6931534	206	103824	66	6489
GCA_024718675.1	6932791	213	103537	66	6499
GCA_024718775.1	6937649	235	71129	66	6504
GCA_024718985.1	6937524	233	83854	66	6499
GCA_024719085.1	6960831	82	248107	66	6424
GCA_024719315.1	6707317	269	60337	66	6322
GCA_024719515.1	6932053	202	100342	66	6485
GCA_024719815.1	6915651	193	97948	66	6453
GCA_024719915.1	6917255	215	91486	66	6473
GCA_024720015.1	6914853	212	81411	66	6479
GCA_024720115.1	6961874	71	262377	66	6424
GCA_024720215.1	7384520	288	79777	65.5	7035
GCA_024720315.1	6940042	180	122219	66	6472
GCA_024720325.1	6936964	186	91565	66	6473
GCA_024720415.1	6702048	223	75058	66	6263
GCA_024720435.1	6935549	227	69548	66	6504
GCA_024720525.1	6933324	227	87813	66	6498
GCA_024720615.1	6931459	224	90346	66	6483
GCA_024720725.1	6931987	210	92041	66	6491
GCA_024734795.1	6871852	1	6871852	66	6229
GCA_024734815.1	6515978	1	6515978	66.5	5901
GCA_024719925.1	6914262	237	82393	66	6484
GCA_024719995.1	6930318	199	138061	66	6490
GCA_024720095.1	6935875	237	79554	66	6505
GCA_024720195.1	6932926	218	82925	66	6494
GCA_024720485.1	6933085	205	89355	66	6466
GCA_024720695.1	6930299	227	89360	66	6496
GCA_024714565.1	6935789	219	82909	66	6483
GCA_024714595.1	6935718	153	159380	66	6451
GCA_024714665.1	6936359	173	108834	66	6450
GCA_024714695.1	6936476	178	133986	66	6465
GCA_024714765.1	6954493	98	238311	66	6438
GCA_024714865.1	6719782	231	72250	66	6291
GCA_024715075.1	6939131	172	125491	66	6467
GCA_024715175.1	6717377	205	85604	66	6287
GCA_024715205.1	6719827	209	79527	66	6299
GCA_024715325.1	6765274	84	249889	66	6229
GCA_024715365.1	6694297	180	94516	66	6239
GCA_024715415.1	6774544	220	87529	66	6355
GCA_024715465.1	6933365	202	95646	66	6476
GCA_024715515.1	6716799	204	91625	66	6294
GCA_024715565.1	6744526	240	59395	66	6312
GCA_024715675.1	6775999	234	81248	66	6372
GCA_024715695.1	6775695	213	86799	66	6352
GCA_024715715.1	6871697	181	99676	66	6418
GCA_024715775.1	6935474	212	79814	66	6495
GCA_024715795.1	6777421	205	86323	66	6348
GCA_024715835.1	6720192	212	82925	66	6296
GCA_024715875.1	6718473	196	91750	66	6276
GCA_024715895.1	6870059	230	79527	66	6443
GCA_024715935.1	6720944	213	86505	66	6293
GCA_024715975.1	6746523	216	73278	66	6308
GCA_024715995.1	6719749	237	80509	66	6311
GCA_024716095.1	6742989	238	67532	66	6320
GCA_024716185.1	6940285	236	70732	66	6502
GCA_024716405.1	6712929	197	95126	66	6291
GCA_024716595.1	6774822	219	79377	66	6330
GCA_024716705.1	6779937	335	61780	66	6392
GCA_024716785.1	6935569	333	81660	66	6532
GCA_024716895.1	6716847	224	84396	66	6304
GCA_024716905.1	6940460	225	85593	66	6497
GCA_024716945.1	6938235	209	87863	66	6485
GCA_024716995.1	6942157	225	89367	66	6497
GCA_024717035.1	6769852	218	87275	66	6337
GCA_024717055.1	6782974	376	97196	66	6401
GCA_024717195.1	6813853	297	89355	66	6455
GCA_024717215.1	6934019	201	94970	66	6474
GCA_024717315.1	6716803	219	84257	66	6304
GCA_024718655.1	6935197	201	99959	66	6490
GCA_024718755.1	6939248	232	78418	66	6500
GCA_024718855.1	6936850	235	79530	66	6503
GCA_024719065.1	6932577	247	62250	66	6487
GCA_024719195.1	6935328	264	67657	66	6509
GCA_024719275.1	6936097	255	56558	66	6507
GCA_024719375.1	6775993	254	57435	66	6360
GCA_024719475.1	6936713	249	63627	66	6504
GCA_024719585.1	6932640	217	86913	66	6497
GCA_024719675.1	6933264	221	101836	66	6500
GCA_024719795.1	6918190	206	113483	66	6470
GCA_024719895.1	6928490	238	91593	66	6506
GCA_026337635.1	6363383	93	283096	66.5	5840
GCA_026337675.1	6350074	93	283140	66.5	5826
GCA_029622995.1	7206220	159	137868	66	6681
GCA_029568485.1	7930982	124	269667	65.5	7477
GCA_029635985.1	6799293	77	217183	66	6234
GCA_030253475.1	7082165	1	7082165	66	6411
GCA_030504695.1	6979689	357	77706	66	6493
GCA_029635925.2	6806745	135	137994	66	6305
GCA_029635965.2	6657461	91	217138	66	6118
GCA_029636025.2	6562099	74	308248	66	6065
GCA_030504675.1	6935219	279	70718	66	6456
GCA_032329515.2	6899846	54	440176	66.5	6349
GCA_032335095.2	6638317	73	213843	66	6144
