# Supplementary material for: Direct prediction of antimicrobial resistance in Pseudomonas aeruginosa by metagenomic next-generation sequencing
Source: Front Microbiol. 2024 Jun 6;15:1413434. doi: 10.3389/fmicb.2024.1413434 (PMC11187003; doi:10.3389/fmicb.2024.1413434)
Supplement: SUPPLEMENTARY TABLE S2 — The information about the gene copy number. The IDs marked in green were from the referenced study, and the IDs marked in purple were from the NCBI NDARO database. [file Table_2.XLSX]

## Sheet: data-
	Genome Name	oprB	gltK	gtsC	gtsB	gtsA	rstB	gltR	glk	edd	gap	RSC1457	scpB	scpA	yciO	trpH	ispZ	yciI	cpxR	spy	cpxA	ydjA	ykgJ	trkH	mlaE_1	iamA	MA20_08125	MA20_38065	cyaB	gtrA	lpxH_2	csaA	rhaT	azoR	IV02_08490	ppiA	bapA	MA20_36195	dnaQ	actP	yjcH	opuAC	VP2647	IV02_22745	vacJ	yhhW	lpxL	minC	minD
	GCA_033798265.1	5	2	1	1	1	1	3	1	1	1	1	1	1	1	1	1	1	1	1	2	1	1	1	1	1	1	1	1	1	1	1	1	3	1	1	1	1	3	2	1	2	2	1	2	2	1	1	1
	GCA_033798445.1	3	3	1	1	1	1	4	1	1	1	1	1	1	1	1	1	1	1	1	2	1	1	2	2	2	2	2	1	1	1	1	1	3	1	1	1	1	3	2	1	2	1	1	2	3	1	1	1
	GCA_033798425.1	4	2	1	1	1	1	3	1	1	1	1	1	1	1	1	1	1	1	1	2	1	1	1	1	1	1	1	1	1	1	1	1	3	1	1	1	1	3	1	1	2	2	1	2	2	1	1	1
	GCA_033798385.1	5	2	1	1	1	1	3	1	1	1	1	1	1	1	1	1	1	1	1	2	1	1	1	1	1	1	1	1	1	1	1	1	3	1	1	1	1	3	2	1	2	1	1	2	2	1	1	1
	GCA_033798395.1	5	3	1	1	1	1	4	1	1	1	1	1	1	1	1	1	1	1	1	2	1	1	2	1	1	1	1	1	1	1	1	1	3	1	1	1	1	3	2	1	2	1	1	2	2	1	1	1
	GCA_033798345.1	3	2	1	1	1	1	4	1	1	1	1	1	1	1	1	1	1	1	1	2	1	1	2	1	1	1	1	1	1	1	1	1	3	1	1	1	1	3	3	1	2	1	1	2	2	1	1	1
	GCA_033798365.1	5	3	1	1	1	1	3	1	1	1	1	1	1	1	1	1	1	1	1	2	1	1	1	1	1	1	1	1	1	1	1	1	3	1	1	1	1	3	2	1	2	1	1	2	2	1	1	1
	GCA_033798285.1	5	2	1	1	1	1	4	1	1	1	1	1	1	1	1	1	1	1	1	2	1	1	2	2	2	2	2	1	1	1	1	1	3	1	1	1	1	3	2	1	2	1	1	2	3	1	1	1
	GCA_033798305.1	5	2	1	1	1	1	3	1	1	1	1	1	1	1	1	1	1	1	1	2	1	1	1	1	1	1	1	1	1	1	1	1	3	1	1	1	1	3	2	1	2	1	1	2	2	1	1	1
	GCA_033798325.1	4	2	1	1	1	1	3	1	1	1	1	1	1	1	1	1	1	1	1	2	1	1	1	1	1	1	1	1	1	1	1	1	3	1	1	1	1	3	1	1	2	2	1	2	2	1	1	1
	GCA_033798045.1	5	3	1	1	1	1	4	1	1	1	1	1	1	1	1	1	1	1	1	2	1	1	2	1	1	1	1	1	1	1	1	1	3	1	1	1	1	3	2	1	2	1	1	2	2	1	1	1
	GCA_033798245.1	4	2	1	1	1	1	4	1	1	1	1	1	1	1	1	1	1	1	1	2	1	1	2	1	1	1	1	1	1	1	1	1	3	1	1	1	1	3	2	1	2	1	1	2	2	1	1	1
	GCA_033798225.1	3	2	1	1	1	1	3	1	1	1	1	1	1	1	1	1	1	1	1	2	1	1	1	1	1	1	1	1	1	1	1	1	3	1	1	1	1	3	2	1	2	1	1	2	3	1	1	1
	GCA_033798185.1	4	2	1	1	1	1	4	1	1	1	1	1	1	1	1	1	1	1	1	2	1	1	2	1	1	1	1	1	1	1	1	1	3	1	1	1	1	3	2	1	2	1	1	2	2	1	1	1
	GCA_033798205.1	5	2	1	1	1	1	3	1	1	1	1	1	1	1	1	1	1	1	1	2	1	1	2	1	1	1	1	1	1	1	1	1	3	1	1	1	1	3	3	1	2	1	1	2	2	1	1	1
	GCA_033798165.1	4	2	1	1	1	1	3	1	1	1	1	1	1	1	1	1	1	1	1	2	1	1	1	1	1	1	1	1	1	1	1	1	3	1	1	1	1	3	2	1	2	1	1	2	2	1	1	1
	GCA_033798145.1	4	2	1	1	1	1	3	1	1	1	1	1	1	1	1	1	1	1	1	2	1	1	1	1	1	1	2	1	1	1	1	1	3	1	1	1	1	3	2	1	2	1	1	2	2	1	1	1
	GCA_033798125.1	5	2	1	1	1	1	3	1	1	1	1	1	1	1	1	1	1	1	1	2	1	1	1	1	1	1	1	1	1	1	1	1	3	1	1	1	1	3	2	1	2	1	1	2	2	1	1	1
	GCA_033798085.1	4	2	1	1	1	1	3	1	1	1	1	1	1	1	1	1	1	1	1	2	1	1	2	1	1	1	1	1	1	1	1	1	3	1	1	1	1	3	1	1	2	1	1	2	2	1	1	1
	GCA_033798105.1	3	2	1	1	1	1	3	1	1	1	1	1	1	1	1	1	1	1	1	2	1	1	1	1	1	1	1	1	1	1	1	1	3	1	1	1	1	3	2	1	2	2	1	2	2	1	1	1
	GCA_033798065.1	5	2	1	1	1	1	4	1	1	1	1	1	1	1	1	1	1	1	1	2	1	1	2	2	2	2	2	1	1	1	1	1	3	1	1	1	1	3	2	1	2	1	1	2	3	1	1	1
	GCA_033797845.1	5	2	1	1	1	1	3	1	1	1	1	1	1	1	1	1	1	1	1	2	1	1	1	2	2	2	2	1	1	1	1	1	3	1	1	2	1	3	2	1	2	2	1	2	2	1	1	1
	GCA_033798005.1	2	2	1	1	1	1	4	1	1	1	1	1	1	1	1	1	1	1	1	2	1	1	1	1	1	1	1	1	1	1	1	1	3	1	1	1	1	3	2	1	2	2	1	2	2	1	1	1
	GCA_033798015.1	4	2	1	1	1	1	3	1	1	1	1	1	1	1	1	1	1	1	1	2	1	1	1	1	1	1	1	1	1	1	1	1	3	1	1	1	1	3	1	1	2	2	1	2	2	1	1	1
	GCA_033797985.1	5	2	1	1	1	1	3	1	1	1	1	1	1	1	1	1	1	1	1	2	1	1	1	2	2	2	2	1	1	1	1	1	3	1	1	2	1	3	2	1	2	2	1	2	2	1	1	1
	GCA_033797965.1	3	2	1	1	1	1	3	1	1	1	1	1	1	1	1	1	1	1	1	2	1	1	1	1	1	1	1	1	1	1	1	1	3	1	1	1	1	3	1	1	2	2	1	2	2	1	1	1
	GCA_033797945.1	5	3	1	1	1	1	4	1	1	1	1	1	1	1	1	1	1	1	1	2	1	1	2	1	1	1	1	1	1	1	1	1	3	1	1	1	1	3	2	1	2	1	1	2	2	1	1	1
	GCA_033797905.1	3	2	1	1	1	1	4	1	1	1	1	1	1	1	1	1	1	1	1	2	1	1	2	1	1	1	1	1	1	1	1	1	3	1	1	1	1	3	2	1	2	1	1	2	2	1	1	1
	GCA_033797925.1	3	2	1	1	1	1	3	1	1	1	1	1	1	1	1	1	1	1	1	2	1	1	1	1	1	1	1	1	1	1	1	1	3	1	1	1	1	3	2	1	2	2	1	2	2	1	1	1
	GCA_033797885.1	5	3	1	1	1	1	4	1	1	1	1	1	1	1	1	1	1	1	1	2	1	1	2	1	1	1	1	1	1	1	1	1	3	1	1	1	1	3	2	1	2	1	1	2	2	1	1	1
	GCA_033797865.1	4	2	1	1	1	1	3	1	1	1	1	1	1	1	1	1	1	1	1	2	1	1	1	2	2	2	2	1	1	1	1	1	3	1	1	2	1	3	2	1	2	2	1	2	2	1	1	1
	GCA_033797595.1	5	2	1	1	1	1	3	1	1	1	1	1	1	1	1	1	1	1	1	2	1	1	1	1	1	1	1	1	1	1	1	1	3	1	1	1	1	3	2	1	2	1	1	2	2	1	1	1
	GCA_033797805.1	4	2	1	1	1	1	3	1	1	1	1	1	1	1	1	1	1	1	1	2	1	1	1	1	1	1	1	1	1	1	1	1	3	1	1	1	1	3	1	1	2	2	1	2	2	1	1	1
	GCA_033797825.1	4	2	1	1	1	1	3	1	1	1	1	1	1	1	1	1	1	1	1	2	1	1	1	1	1	1	1	1	1	1	1	1	3	1	1	1	1	3	2	1	2	2	1	2	2	1	1	1
	GCA_033797785.1	3	2	1	1	1	1	4	1	1	1	1	1	1	1	1	1	1	1	1	2	1	1	1	1	1	1	1	1	1	1	1	1	3	1	1	1	1	3	3	1	2	1	1	2	2	1	1	1
	GCA_033797765.1	1	2	1	1	1	1	3	1	1	1	1	1	1	1	1	1	1	1	1	2	1	1	1	1	1	1	1	1	1	1	1	1	3	1	1	1	1	3	1	1	2	1	1	2	2	1	1	1
	GCA_033797745.1	5	3	1	1	1	1	4	1	1	1	1	1	1	1	1	1	1	1	1	2	1	1	2	1	1	1	1	1	1	1	1	1	3	1	1	1	1	3	2	1	2	1	1	2	2	1	1	1
	GCA_033797695.1	4	3	1	1	1	1	4	1	1	1	1	1	1	1	1	1	1	1	1	2	1	1	2	1	1	1	1	1	1	1	1	1	3	1	1	1	1	3	2	1	2	1	1	2	2	1	1	1
	GCA_033797675.1	4	2	1	1	1	1	3	1	1	1	1	1	1	1	1	1	1	1	1	2	1	1	1	1	1	1	1	1	1	1	1	1	3	1	1	1	1	3	2	1	2	2	1	2	2	1	1	1
	GCA_033797655.1	5	2	1	1	1	1	3	1	1	1	1	1	1	1	1	1	1	1	1	2	1	1	1	1	1	1	1	1	1	1	1	1	3	1	1	1	1	3	2	1	2	1	1	2	2	1	1	1
	GCA_033797635.1	5	2	1	1	1	1	3	1	1	1	1	1	1	1	1	1	1	1	1	2	1	1	1	1	1	1	1	1	1	1	1	1	3	1	1	1	1	3	2	1	2	1	1	2	2	1	1	1
	GCA_033797615.1	4	2	1	1	1	1	3	1	1	1	1	1	1	1	1	1	1	1	1	2	1	1	1	1	1	1	1	1	1	1	1	1	3	1	1	1	1	3	2	1	2	2	1	2	2	1	1	1
	GCA_033797495.1	5	2	1	1	1	1	4	1	1	1	1	1	1	1	1	1	1	1	1	2	1	1	2	2	2	2	2	1	1	1	1	1	3	1	1	1	1	3	2	1	2	1	1	2	3	1	1	1
	GCA_033797575.1	5	3	1	1	1	1	4	1	1	1	1	1	1	1	1	1	1	1	1	2	1	1	2	2	2	2	2	1	1	1	1	1	3	1	1	1	1	3	2	1	2	1	1	2	2	1	1	1
	GCA_033797555.1	5	2	1	1	1	1	3	1	1	1	1	1	1	1	1	1	1	1	1	2	1	1	1	1	1	1	1	1	1	1	1	1	3	1	1	1	1	3	2	1	2	2	1	2	2	1	1	1
	GCA_033797535.1	4	2	1	1	1	1	3	1	1	1	1	1	1	1	1	1	1	1	1	2	1	1	1	1	1	1	1	1	1	1	1	1	3	1	1	1	1	3	1	1	2	2	1	2	2	1	1	1
	GCA_033797515.1	5	2	1	1	1	1	3	1	1	1	1	1	1	1	1	1	1	1	1	2	1	1	1	1	1	1	1	1	1	1	1	1	3	1	1	1	1	3	2	1	2	2	1	2	2	1	1	1
	GCA_033797475.1	5	2	1	1	1	1	3	1	1	1	1	1	1	1	1	1	1	1	1	2	1	1	1	1	1	1	1	1	1	1	1	1	3	1	1	1	1	3	2	1	2	1	1	2	2	1	1	1
	GCA_033797455.1	5	2	1	1	1	1	4	1	1	1	1	1	1	1	1	1	1	1	1	2	1	1	2	1	1	1	1	1	1	1	1	1	3	1	1	1	1	3	2	1	2	1	1	2	2	1	1	1
	GCA_033797435.1	5	2	1	1	1	1	3	1	1	1	1	1	1	1	1	1	1	1	1	2	1	1	1	1	1	1	1	1	1	1	1	1	3	1	1	1	1	3	2	1	2	2	1	2	2	1	1	1
	GCA_033797415.1	5	2	1	1	1	1	3	1	1	1	1	1	1	1	1	1	1	1	1	2	1	1	1	1	1	1	1	1	1	1	1	1	3	1	1	1	1	3	2	1	2	2	1	2	2	1	1	1
	GCA_033797395.1	5	2	1	1	1	1	4	1	1	1	1	1	1	1	1	1	1	1	1	2	1	1	1	1	1	1	1	1	1	1	1	1	3	1	1	1	1	3	2	1	2	2	1	2	2	1	1	1
	GCA_033797375.1	4	2	1	1	1	1	4	1	1	1	1	1	1	1	1	1	1	1	1	2	1	1	2	1	1	1	1	1	1	1	1	1	3	1	1	1	1	3	1	1	2	1	1	2	3	1	1	1
	GCA_033797385.1	5	2	1	1	1	1	3	1	1	1	1	1	1	1	1	1	1	1	1	2	1	1	2	1	1	1	1	1	1	1	1	1	3	1	1	1	1	3	2	1	2	1	1	2	2	1	1	1
	GCA_033797365.1	5	3	1	1	1	1	3	1	1	1	1	1	1	1	1	1	1	1	1	2	1	1	1	1	1	1	1	1	1	1	1	1	3	1	1	1	1	3	2	1	2	1	1	2	2	1	1	1
	GCA_033797345.1	5	2	1	1	1	1	3	1	1	1	1	1	1	1	1	1	1	1	1	2	1	1	1	2	2	2	2	1	1	1	1	1	3	1	1	2	1	3	2	1	2	2	1	2	2	1	1	1
	GCA_033797325.1	3	2	1	1	1	1	4	1	1	1	1	1	1	1	1	1	1	1	1	2	1	1	2	2	2	2	2	1	1	1	1	1	3	1	1	1	1	3	2	1	2	1	1	2	2	1	1	1
	GCA_033797285.1	5	2	1	1	1	1	3	1	1	1	1	1	1	1	1	1	1	1	1	2	1	1	1	1	1	1	1	1	1	1	1	1	3	1	1	1	1	3	2	1	2	2	1	2	2	1	1	1
	GCA_033797245.1	3	3	1	1	1	1	4	1	1	1	1	1	1	1	1	1	1	1	1	2	1	1	2	2	2	2	2	1	1	1	1	1	3	1	1	1	1	3	2	1	2	1	1	2	3	1	1	1
	GCA_033797275.1	2	2	1	1	1	1	4	1	1	1	1	1	1	1	1	1	1	1	1	2	1	1	2	1	1	1	1	1	1	1	1	1	3	1	1	1	1	3	2	1	2	1	1	2	2	1	1	1
	GCA_033797265.1	5	2	1	1	1	1	2	1	1	1	1	1	1	1	1	1	1	1	1	2	1	1	3	1	1	1	1	1	1	1	1	1	4	1	1	1	1	3	2	1	2	2	1	2	2	1	1	1
	GCA_033797225.1	4	2	1	1	1	1	3	1	1	1	1	1	1	1	1	1	1	1	1	2	1	1	1	1	1	1	1	1	1	1	1	1	3	1	1	1	1	3	1	1	2	2	1	2	2	1	1	1
	GCA_033797175.1	4	2	1	1	1	1	4	1	1	1	1	1	1	1	1	1	1	1	1	2	1	1	2	2	2	2	2	1	1	1	1	1	3	1	1	1	1	3	2	1	2	1	1	2	3	1	1	1
	GCA_033797165.1	5	2	1	1	1	1	4	1	1	1	1	1	1	1	1	1	1	1	1	2	1	1	3	1	1	1	1	1	1	1	1	1	3	1	1	1	1	5	2	1	2	1	1	2	2	1	1	1
	GCA_033797145.1	5	2	1	1	1	1	4	1	1	1	1	1	1	1	1	1	1	1	1	2	1	1	3	1	1	1	1	1	1	1	1	1	3	1	1	1	1	3	2	1	2	1	1	2	2	1	1	1
	GCA_033797155.1	5	2	1	1	1	1	3	1	1	1	1	1	1	1	1	1	1	1	1	2	1	1	1	1	1	1	1	1	1	1	1	1	3	1	1	1	1	3	2	1	2	2	1	2	2	1	1	1
	GCA_033797125.1	5	2	1	1	1	1	3	1	1	1	1	1	1	1	1	1	1	1	1	2	1	1	1	1	1	1	1	1	1	1	1	1	3	1	1	1	1	3	2	1	2	1	1	2	2	1	1	1
	GCA_033797105.1	3	2	1	1	1	1	4	1	1	1	1	1	1	1	1	1	1	1	1	2	1	1	2	1	1	1	1	1	1	1	1	1	3	1	1	1	1	3	2	1	2	1	1	2	2	1	1	1
	GCA_033797075.1	3	2	1	1	1	1	3	1	1	1	1	1	1	1	1	1	1	1	1	2	1	1	1	1	1	1	1	1	1	1	1	1	3	1	1	1	1	3	1	1	2	1	1	2	2	1	1	1
	GCA_033797065.1	2	2	1	1	1	1	3	1	1	1	1	1	1	1	1	1	1	1	1	2	1	1	1	1	1	1	1	1	1	1	1	1	3	1	1	1	1	3	1	1	2	1	1	2	2	1	1	1
	GCA_033797035.1	5	2	1	1	1	1	3	1	1	1	1	1	1	1	1	1	1	1	1	2	1	1	1	1	1	1	1	1	1	1	1	1	3	1	1	1	1	3	1	1	2	2	1	2	2	1	1	1
	GCA_033797025.1	5	2	1	1	1	1	4	1	1	1	1	1	1	1	1	1	1	1	1	2	1	1	1	1	1	1	1	1	1	1	1	1	3	1	1	1	1	3	2	1	2	1	1	2	2	1	1	1
	GCA_033796975.1	5	2	1	1	1	1	4	1	1	1	1	1	1	1	1	1	1	1	1	2	1	1	2	1	1	1	1	1	1	1	1	1	3	1	1	1	1	3	2	1	2	1	1	2	2	1	1	1
	GCA_033797005.1	5	2	1	1	1	1	3	1	1	1	1	1	1	1	1	1	1	1	1	2	1	1	1	1	1	1	1	1	1	1	1	1	3	1	1	1	1	5	2	1	2	2	1	2	2	1	1	1
	GCA_033796965.1	5	2	1	1	1	1	3	1	1	1	1	1	1	1	1	1	1	1	1	2	1	1	1	1	1	1	1	1	1	1	1	1	3	1	1	1	1	3	1	1	2	1	1	2	2	1	1	1
	GCA_033796945.1	4	2	1	1	1	1	3	1	1	1	1	1	1	1	1	1	1	1	1	2	1	1	1	1	1	1	1	1	1	1	1	1	3	1	1	1	1	3	1	1	2	1	1	2	2	1	1	1
	GCA_033796925.1	3	2	1	1	1	1	3	1	1	1	1	1	1	1	1	1	1	1	1	2	1	1	1	1	1	1	1	1	1	1	1	1	3	1	1	1	1	3	2	1	2	2	1	2	2	1	1	1
	GCA_033796905.1	2	2	1	1	1	1	3	1	1	1	1	1	1	1	1	1	1	1	1	2	1	1	1	1	1	1	1	1	1	1	1	1	3	1	1	1	1	3	1	1	2	2	1	2	2	1	1	1
	GCA_033796885.1	5	2	1	1	1	1	4	1	1	1	1	1	1	1	1	1	1	1	1	2	1	1	1	1	1	1	1	1	1	1	1	1	3	1	1	1	1	3	2	1	2	1	1	2	2	1	1	1
	GCA_033796865.1	5	2	1	1	1	1	3	1	1	1	1	1	1	1	1	1	1	1	1	2	1	1	1	1	1	1	1	1	1	1	1	1	3	1	1	2	1	3	2	1	2	2	1	2	2	1	1	1
	GCA_033796845.1	4	2	1	1	1	1	4	1	1	1	1	1	1	1	1	1	1	1	1	2	1	1	1	1	1	1	1	1	1	1	1	1	3	1	1	1	1	3	2	1	2	1	1	2	2	1	1	1
	GCA_033796805.1	5	2	1	1	1	1	3	1	1	1	1	1	1	1	1	1	1	1	1	2	1	1	1	1	1	1	1	1	1	1	1	1	3	1	1	1	1	4	2	1	2	1	1	2	2	1	1	1
	GCA_033796825.1	3	2	1	1	1	1	3	1	1	1	1	1	1	1	1	1	1	1	1	2	1	1	1	1	1	1	1	1	1	1	1	1	3	1	1	1	1	3	1	1	2	2	1	2	2	1	1	1
	GCA_033796765.1	3	2	1	1	1	1	3	1	1	1	1	1	1	1	1	1	1	1	1	2	1	1	1	2	2	2	2	1	1	1	1	1	3	1	1	1	1	3	2	1	2	2	1	2	2	1	1	1
	GCA_033796775.1	2	3	1	1	1	1	4	1	1	1	1	1	1	1	1	1	1	1	1	2	1	1	1	1	1	1	1	1	1	1	1	1	3	1	1	1	1	3	3	1	2	2	1	2	2	1	1	1
	GCA_033796745.1	2	3	1	1	1	1	4	1	1	1	1	1	1	1	1	1	1	1	1	2	1	1	1	1	1	1	1	1	1	1	1	1	3	1	1	1	1	3	3	1	2	2	1	2	2	1	1	1
	GCA_033796705.1	5	2	1	1	1	1	4	1	1	1	1	1	1	1	1	1	1	1	1	2	1	1	2	2	2	2	2	1	1	1	1	1	3	1	1	1	1	3	2	1	2	1	1	2	3	1	1	1
	GCA_033796725.1	4	2	1	1	1	1	4	1	1	1	1	1	1	1	1	1	1	1	1	2	1	1	2	1	1	1	1	1	1	1	1	1	3	1	1	1	1	3	2	1	2	1	1	2	2	1	1	1
	GCA_033796665.1	5	2	1	1	1	1	3	1	1	1	1	1	1	1	1	1	1	1	1	2	1	1	1	1	1	1	1	1	1	1	1	1	3	1	1	1	1	3	2	1	2	2	1	2	2	1	1	1
	GCA_033796675.1	5	2	1	1	1	1	3	1	1	1	1	1	1	1	1	1	1	1	1	2	1	1	1	2	2	2	2	1	1	1	1	1	3	1	1	1	1	3	2	1	2	1	1	2	2	1	1	1
	GCA_033796645.1	3	2	1	1	1	1	3	1	1	1	1	1	1	1	1	1	1	1	1	2	1	1	1	1	1	1	1	1	1	1	1	1	3	1	1	1	1	3	2	1	2	2	1	2	2	1	1	1
	GCA_033796625.1	5	2	1	1	1	1	4	1	1	1	1	1	1	1	1	1	1	1	1	2	1	1	2	2	2	2	2	1	1	1	1	1	3	1	1	1	1	3	2	1	2	1	1	2	3	1	1	1
	GCA_033796585.1	5	2	1	1	1	1	3	1	1	1	1	1	1	1	1	1	1	1	1	2	1	1	1	1	1	1	1	1	1	1	1	1	3	1	1	1	1	3	1	1	2	2	1	2	2	1	1	1
	GCA_033796595.1	5	3	1	1	1	1	4	1	1	1	1	1	1	1	1	1	1	1	1	2	1	1	2	1	1	1	1	1	1	1	1	1	3	1	1	1	1	3	2	1	2	1	1	2	2	1	1	1
	GCA_033796565.1	5	2	1	1	1	1	4	1	1	1	1	1	1	1	1	1	1	1	1	2	1	1	2	2	2	2	2	1	1	1	1	1	3	1	1	1	1	3	2	1	2	1	1	2	3	1	1	1
	GCA_033796545.1	5	2	1	1	1	1	3	1	1	1	1	1	1	1	1	1	1	1	1	2	1	1	1	1	1	1	1	1	1	1	1	1	3	1	1	1	1	3	2	1	2	2	1	2	2	1	1	1
	GCA_033796495.1	2	3	1	1	1	1	4	1	1	1	1	1	1	1	1	1	1	1	1	2	1	1	1	1	1	1	1	1	1	1	1	1	3	1	1	1	1	3	3	1	2	2	1	2	2	1	1	1
	GCA_033796525.1	4	2	1	1	1	1	3	1	1	1	1	1	1	1	1	1	1	1	1	2	1	1	1	1	1	1	1	1	1	1	1	1	3	1	1	1	1	3	2	1	2	2	1	2	2	1	1	1
	GCA_033796485.1	5	2	1	1	1	1	3	1	1	1	1	1	1	1	1	1	1	1	1	2	1	1	1	1	1	1	1	1	1	1	1	1	3	1	1	2	1	3	2	1	2	1	1	2	2	1	1	1
	GCA_033796445.1	5	2	1	1	1	1	3	1	1	1	1	1	1	1	1	1	1	1	1	2	1	1	1	1	1	1	1	1	1	1	1	1	3	1	1	1	1	3	2	1	2	1	1	2	2	1	1	1
	GCA_000710625.1	2	2	1	1	1	1	3	1	1	1	1	1	1	1	1	1	1	1	1	2	1	1	1	1	1	1	1	1	1	1	1	1	3	1	1	1	1	3	2	1	2	1	1	2	2	1	1	1
	GCA_001874995.1	2	3	1	1	1	1	4	1	1	1	1	1	1	1	1	1	1	1	1	2	1	1	2	1	1	1	1	1	1	1	1	1	3	1	1	1	1	3	1	1	2	1	1	2	2	1	1	1
	GCA_002997005.1	2	2	1	1	1	1	4	1	1	1	1	1	1	1	1	1	1	1	1	2	1	1	2	1	1	1	1	1	1	1	1	1	3	1	1	1	1	3	3	1	2	1	1	2	2	1	1	1
	GCA_003260415.1	2	2	1	1	1	1	4	1	1	1	1	1	1	1	1	1	1	1	1	2	1	1	1	2	2	2	2	1	1	1	1	1	3	1	1	1	1	3	2	1	2	1	1	2	2	1	1	1
	GCA_003288435.1	2	2	1	1	1	1	3	1	1	1	1	1	1	1	1	1	1	1	1	2	1	1	1	1	1	1	1	1	1	1	1	1	3	1	1	1	1	3	2	1	2	2	1	2	2	1	1	1
	GCA_003968305.1	3	3	1	1	1	1	4	1	1	1	1	1	1	1	1	1	1	1	1	2	1	1	2	1	1	1	1	1	1	1	1	1	3	1	1	1	1	3	2	1	1	1	1	2	2	1	1	1
	GCA_003968325.1	3	2	1	1	1	1	3	1	1	1	1	1	1	1	1	1	1	1	1	2	1	1	1	1	1	1	2	1	1	1	1	1	3	1	1	1	1	3	1	1	2	2	1	2	2	1	1	1
	GCA_003968375.1	2	2	1	1	1	1	3	1	1	1	1	1	1	1	1	1	1	1	1	2	1	1	1	1	1	1	1	1	1	1	1	1	3	1	1	1	1	3	1	1	2	1	1	2	2	1	1	1
	GCA_003968445.1	3	2	1	1	1	1	4	1	1	1	1	1	1	1	1	1	1	1	1	2	1	1	2	1	1	1	2	1	1	1	1	1	3	1	1	2	1	3	2	1	2	1	1	2	2	1	1	1
	GCA_003968525.1	3	2	1	1	1	1	4	1	1	1	1	1	1	1	1	1	1	1	1	2	1	1	1	1	1	1	1	1	1	1	1	1	3	1	1	1	1	3	2	1	2	1	1	2	2	1	1	1
	GCA_003968565.1	1	2	1	1	1	1	4	1	1	1	1	1	1	1	1	1	1	1	1	2	1	1	1	1	1	1	1	1	1	1	1	1	3	1	1	1	1	3	2	1	2	1	1	2	2	1	1	1
	GCA_003968615.1	1	2	1	1	1	1	3	1	1	1	1	1	1	1	1	1	1	1	1	2	1	1	2	1	1	1	1	1	1	1	1	1	3	2	1	1	1	3	1	1	2	1	1	2	2	1	1	1
	GCA_003968625.1	3	2	1	1	1	1	3	1	1	1	1	1	1	1	1	1	1	1	1	2	1	1	1	1	1	1	1	1	1	1	1	1	3	1	1	1	1	3	2	1	2	2	1	2	2	1	1	1
	GCA_003968935.1	1	2	1	1	1	1	3	1	1	1	1	1	1	1	1	1	1	1	1	2	1	1	1	1	1	1	1	1	1	1	1	1	3	1	1	1	1	3	2	1	2	2	1	2	2	1	1	1
	GCA_003968985.1	3	2	1	1	1	1	3	1	1	1	1	1	1	1	1	1	1	1	1	2	1	1	1	1	1	1	1	1	1	1	1	1	3	1	1	1	1	3	2	1	2	2	1	2	2	1	1	1
	GCA_003969065.1	3	3	1	1	1	1	3	1	1	1	1	1	1	1	1	1	1	1	1	2	1	1	1	1	1	1	2	1	1	1	1	1	3	1	1	2	1	3	1	1	2	2	1	2	2	1	1	1
	GCA_003969075.1	3	2	1	1	1	1	3	1	1	1	1	1	1	1	1	1	1	1	1	2	1	1	1	1	1	1	2	1	1	1	1	1	3	1	1	1	1	3	2	1	2	2	1	2	2	1	1	1
	GCA_003969155.1	3	2	1	1	1	1	4	1	1	1	1	1	1	1	1	1	1	1	1	2	1	1	1	1	1	1	2	1	1	1	1	1	3	1	1	1	1	3	2	1	2	2	1	2	2	1	1	1
	GCA_003969165.1	1	2	1	1	1	1	3	1	1	1	1	1	1	1	1	1	1	1	1	2	1	1	1	1	1	1	1	1	1	1	1	1	3	1	1	1	1	3	2	1	2	2	1	2	2	1	1	1
	GCA_003969195.1	5	2	1	1	1	1	3	1	1	1	1	1	1	1	1	1	1	1	1	2	1	1	1	1	1	1	1	1	1	1	1	1	3	1	1	1	1	3	2	1	2	2	1	2	2	1	1	1
	GCA_003969255.1	1	3	1	1	1	1	4	1	1	1	1	1	1	1	1	1	1	1	1	2	1	1	2	1	1	1	2	1	1	1	1	1	3	1	1	1	1	3	2	1	2	1	1	2	2	1	1	1
	GCA_003969265.1	3	2	1	1	1	1	3	1	1	1	1	1	1	1	1	1	1	1	1	2	1	1	1	1	1	1	1	1	1	1	1	1	3	1	1	1	1	3	2	1	2	1	1	2	2	1	1	1
	GCA_003969315.1	2	2	1	1	1	1	3	1	1	1	1	1	1	1	1	1	1	1	1	2	1	1	1	1	1	1	1	1	1	1	1	1	3	1	1	1	1	3	1	1	2	2	1	2	2	1	1	1
	GCA_003969355.1	3	2	1	1	1	1	3	1	1	1	1	1	1	1	1	1	1	1	1	2	1	1	1	1	1	1	1	1	1	1	1	1	3	1	1	1	1	3	2	1	2	2	1	2	2	1	1	1
	GCA_003969365.1	1	2	1	1	1	1	3	1	1	1	1	1	1	1	1	1	1	1	1	2	1	1	1	1	1	1	2	1	1	1	1	1	3	1	1	1	1	3	2	1	2	2	1	2	2	1	1	1
	GCA_003969395.1	2	2	1	1	1	1	3	1	1	1	1	1	1	1	1	1	1	1	1	2	1	1	1	1	1	1	1	1	1	1	1	1	3	1	1	1	1	3	2	1	2	1	1	2	2	1	1	1
	GCA_003969405.1	3	2	1	1	1	1	3	1	1	1	1	1	1	1	1	1	1	1	1	2	1	1	1	1	1	1	2	1	1	1	1	1	3	1	1	1	1	3	1	1	2	2	1	2	2	1	1	1
	GCA_003969415.1	3	2	1	1	1	1	4	1	1	1	1	1	1	1	1	1	1	1	1	2	1	1	1	1	1	1	2	1	1	1	1	1	3	1	1	1	1	3	1	1	2	2	1	2	2	1	1	1
	GCA_003969445.1	1	2	1	1	1	1	4	1	1	1	1	1	1	1	1	1	1	1	1	2	1	1	1	1	1	1	2	1	1	1	1	1	3	1	1	2	1	3	2	1	2	1	1	2	2	1	1	1
	GCA_003969535.1	1	2	1	1	1	1	3	1	1	1	1	1	1	1	1	1	1	1	1	2	1	1	1	1	2	1	1	1	1	1	1	1	3	1	1	2	1	3	2	1	2	2	1	2	2	1	1	1
	GCA_003969555.1	1	2	1	1	1	1	3	1	1	1	1	1	1	1	1	1	1	1	1	2	1	1	1	1	1	1	1	1	1	1	1	1	3	1	1	1	1	3	3	1	2	1	1	2	2	1	1	1
	GCA_003969565.1	3	2	1	1	1	1	3	1	1	1	1	1	1	1	1	1	1	1	1	2	1	1	1	1	1	1	1	1	1	1	1	1	3	1	1	1	1	3	2	1	2	2	1	2	2	1	1	1
	GCA_003969615.1	1	2	1	1	1	1	3	1	1	1	1	1	1	1	1	1	1	1	1	2	1	1	1	1	1	1	1	1	1	1	1	1	3	1	1	1	1	3	2	1	2	2	1	2	2	1	1	1
	GCA_003969635.1	3	2	1	1	1	1	4	1	1	1	1	1	1	1	1	1	1	1	1	2	1	1	1	1	1	1	1	1	1	1	1	1	3	1	1	1	1	3	2	1	2	1	1	2	2	1	1	1
	GCA_003969725.1	5	2	1	1	1	1	4	1	1	1	1	1	1	1	1	1	1	1	1	2	1	1	2	1	1	1	1	1	1	1	1	1	3	1	1	1	1	3	2	1	2	1	1	2	2	1	1	1
	GCA_003969785.1	2	2	1	1	1	1	3	1	1	1	1	1	1	1	1	1	1	1	1	2	1	1	1	1	1	1	1	1	1	1	1	1	3	1	1	1	1	3	2	1	2	1	1	2	2	1	1	1
	GCA_003969825.1	1	2	1	1	1	1	3	1	1	1	1	1	1	1	1	1	1	1	1	2	1	1	1	1	1	1	2	1	1	1	1	1	3	1	1	1	1	3	1	1	2	1	1	2	2	1	1	1
	GCA_003969975.1	3	2	1	1	1	1	3	1	1	1	1	1	1	1	1	1	1	1	1	2	1	1	1	1	1	1	1	1	1	1	1	1	2	1	1	1	1	3	1	1	2	1	1	2	2	1	1	1
	GCA_003969985.1	1	2	1	1	1	1	3	1	1	1	1	1	1	1	1	1	1	1	1	2	1	1	1	1	1	1	2	1	1	1	1	1	3	1	1	2	1	3	2	1	2	2	1	2	2	1	1	1
	GCA_003970055.1	4	3	1	1	1	1	3	1	1	1	1	1	1	1	1	1	1	1	1	2	1	1	2	1	1	1	1	1	1	1	1	1	3	1	1	1	1	3	2	1	2	1	1	2	2	1	1	1
	GCA_003970635.1	1	2	1	1	1	1	3	1	1	1	1	1	1	1	1	1	1	1	1	2	1	1	1	1	1	1	2	1	1	1	1	1	3	1	1	1	1	3	2	1	2	2	1	2	2	1	1	1
	GCA_003977895.1	5	2	1	1	1	1	4	1	1	1	1	1	1	1	1	1	1	1	1	2	1	1	1	1	1	1	1	1	1	1	1	1	3	1	1	1	1	3	2	1	2	2	1	2	2	1	1	1
	GCA_003977915.1	3	2	1	1	1	1	3	1	1	1	1	1	1	1	1	1	1	1	1	2	1	1	1	1	1	1	2	1	1	1	1	1	3	1	1	1	1	3	2	1	2	1	1	2	2	1	1	1
	GCA_003977935.1	3	2	1	1	1	1	4	1	1	1	1	1	1	1	1	1	1	1	1	2	1	1	1	1	1	1	1	1	1	1	1	1	3	1	1	1	1	3	1	1	2	1	1	2	2	1	1	1
	GCA_003977945.1	3	2	1	1	1	1	3	1	1	1	1	1	1	1	1	1	1	1	1	2	1	1	1	1	1	1	2	1	1	1	1	1	3	1	1	1	1	3	2	1	2	1	1	2	2	1	1	1
	GCA_003977965.1	1	2	1	1	1	1	3	1	1	1	1	1	1	1	1	1	1	1	1	2	1	1	1	1	1	1	2	1	1	1	1	1	3	1	1	2	1	3	2	1	2	2	1	2	2	1	1	1
	GCA_003978035.1	3	2	1	1	1	1	3	1	1	1	1	1	1	1	1	1	1	1	1	2	1	1	1	1	1	1	1	1	1	1	1	1	3	1	1	1	1	3	1	1	2	2	1	2	2	1	1	1
	GCA_007567125.1	3	2	1	1	1	1	3	1	1	1	1	1	1	1	1	1	1	1	1	2	1	1	1	1	1	1	1	1	1	1	1	1	3	1	1	1	1	3	1	1	2	2	1	2	3	1	1	1
	GCA_007567285.1	2	1	1	1	1	1	3	1	1	1	1	1	1	1	1	1	1	1	1	3	1	1	1	1	1	1	1	1	1	1	1	1	3	1	1	1	1	4	2	1	2	1	1	2	2	1	1	1
	GCA_019915445.1	2	2	1	1	1	1	3	1	1	1	1	1	1	1	1	1	1	1	1	2	1	1	1	1	1	1	1	1	1	1	1	1	3	1	1	1	1	3	3	1	2	2	1	2	2	1	1	1
	GCA_019915485.1	2	2	1	1	1	1	4	1	1	1	1	1	1	1	1	1	1	1	1	2	1	1	2	2	2	2	2	1	1	1	1	1	3	1	1	1	1	3	2	1	2	1	1	2	2	1	1	1
	GCA_021245785.1	2	2	1	1	1	1	4	1	1	1	1	1	1	1	1	1	1	1	1	2	1	1	2	1	1	1	1	1	1	1	1	1	3	1	1	1	1	3	2	1	2	1	1	2	2	1	1	1
	GCA_021245865.1	2	2	1	1	1	1	4	1	1	1	1	1	1	1	1	1	1	1	1	2	1	1	2	1	1	1	1	1	1	1	1	1	3	1	1	1	1	3	2	1	2	1	1	2	2	1	1	1
	GCA_021712655.1	4	2	1	1	1	1	4	1	1	1	1	1	1	1	1	1	1	1	1	2	1	1	1	1	1	1	1	1	1	1	1	1	3	1	1	1	1	3	2	1	2	1	1	2	2	1	1	1
	GCA_021712675.1	5	2	1	1	1	1	6	1	1	1	1	1	1	1	1	1	1	1	1	2	1	1	1	1	1	1	1	1	1	1	1	1	3	1	1	2	1	3	2	1	2	1	1	2	2	1	1	1
	GCA_021712735.1	3	3	1	1	1	1	5	1	1	1	1	1	1	1	1	1	1	1	1	2	1	1	3	1	1	1	1	1	1	1	1	1	3	1	1	1	1	3	1	1	2	1	1	2	2	1	1	1
	GCA_021712755.1	4	2	1	1	1	1	4	1	1	1	1	1	1	1	1	1	1	1	1	2	1	1	1	2	2	2	2	1	1	1	1	1	3	1	1	1	1	3	2	1	2	1	1	2	2	1	1	1
	GCA_021712775.1	3	2	1	1	1	1	3	1	1	1	1	1	1	1	1	1	1	1	1	2	1	1	1	1	1	1	1	1	1	1	1	1	3	1	1	2	1	3	2	1	2	2	1	2	2	1	1	1
	GCA_021712795.1	3	3	1	1	1	1	4	1	1	1	1	1	1	1	1	1	1	1	1	2	1	1	3	1	1	1	1	1	1	1	1	1	3	1	1	1	1	3	1	1	2	1	1	2	2	1	1	1
	GCA_021712815.1	5	2	1	1	1	1	4	1	1	1	1	1	1	1	1	1	1	1	1	2	1	1	1	1	1	1	1	1	1	1	1	1	3	1	1	1	1	3	2	1	2	2	1	2	2	1	1	1
	GCA_021712835.1	5	2	1	1	1	1	4	1	1	1	1	1	1	1	1	1	1	1	1	3	1	1	1	1	1	1	1	1	1	1	1	1	3	1	1	1	1	3	3	1	2	2	1	3	2	1	1	1
	GCA_021712855.1	5	2	1	1	1	1	3	1	1	1	1	1	1	1	1	1	1	1	1	2	1	1	1	1	1	1	1	1	1	1	1	1	3	1	1	2	1	3	1	1	2	2	1	2	2	1	1	1
	GCA_021712875.1	2	3	1	1	1	1	4	1	1	1	1	1	1	1	1	1	1	1	1	2	1	1	1	1	1	1	1	1	1	1	1	1	3	1	1	1	1	3	1	1	2	2	1	2	2	1	1	1
	GCA_021712895.1	4	2	1	1	1	1	3	1	1	1	1	1	1	1	1	1	1	1	1	2	1	1	1	1	1	1	1	1	1	1	1	1	3	1	1	1	1	3	1	1	2	1	1	2	2	1	1	1
	GCA_021712935.1	4	2	1	1	1	1	4	1	1	1	1	1	1	1	1	1	1	1	1	2	1	1	1	1	1	1	1	1	1	1	1	1	3	1	1	2	1	3	2	1	2	1	1	2	2	1	1	1
	GCA_021712955.1	3	3	1	1	1	1	5	1	1	1	1	1	1	1	1	1	1	1	1	2	1	1	2	1	1	1	1	1	1	1	1	1	3	1	1	2	1	3	1	1	2	1	1	2	2	1	1	1
	GCA_022966415.1	3	2	1	1	1	1	3	1	1	1	1	1	1	1	1	1	1	1	1	2	1	1	1	1	1	1	1	1	1	1	1	1	3	1	1	1	1	3	2	1	2	1	1	2	2	1	1	1
	GCA_022966435.1	3	2	1	1	1	1	4	1	1	1	1	1	1	1	1	1	1	1	1	2	1	1	1	1	1	1	1	1	1	1	1	1	3	1	1	2	1	3	1	1	2	1	1	2	2	1	1	1
	GCA_022966455.1	2	2	1	1	1	1	4	1	1	1	1	1	1	1	1	1	1	1	1	2	1	1	1	1	1	1	1	1	1	1	1	1	3	1	1	1	1	4	2	1	2	2	1	2	2	1	1	1
	GCA_022966515.1	3	2	1	1	1	1	4	1	1	1	1	1	1	1	1	1	1	1	1	2	1	1	2	1	1	1	1	1	1	1	1	1	3	2	1	1	1	3	1	1	2	1	1	2	2	1	1	1
	GCA_022967415.1	5	3	1	1	1	1	6	1	1	1	1	1	1	1	1	1	1	1	1	2	1	1	1	2	2	2	2	1	1	1	1	1	3	1	1	1	1	3	1	1	2	1	1	2	2	1	1	1
	GCA_022967435.1	3	2	1	1	1	1	3	1	1	1	1	1	1	1	1	1	1	1	1	2	1	1	1	1	1	1	1	1	1	1	1	1	3	1	1	1	1	3	2	1	2	2	1	2	2	1	1	1
	GCA_024714515.1	1	2	1	1	1	1	3	1	1	1	1	1	1	1	1	1	1	1	1	2	1	1	1	1	1	1	2	1	1	1	1	1	3	1	1	1	1	3	2	1	2	1	1	2	2	1	1	1
	GCA_024714535.1	1	2	1	1	1	1	3	1	1	1	1	1	1	1	1	1	1	1	1	2	1	1	1	1	1	1	1	1	1	1	1	1	3	1	1	1	1	3	2	1	2	1	1	2	2	1	1	1
	GCA_024714555.1	1	2	1	1	1	1	3	1	1	1	1	1	1	1	1	1	1	1	1	2	1	1	1	1	1	1	2	1	1	1	1	1	3	1	1	1	1	3	2	1	2	1	1	2	2	1	1	1
	GCA_024714565.1	1	2	1	1	1	1	3	1	1	1	1	1	1	1	1	1	1	1	1	2	1	1	1	1	1	1	2	1	1	1	1	1	3	1	1	1	1	3	2	1	2	1	1	2	2	1	1	1
	GCA_024714595.1	1	2	1	1	1	1	3	1	1	1	1	1	1	1	1	1	1	1	1	2	1	1	1	1	1	1	1	1	1	1	1	1	3	1	1	1	1	3	2	1	2	1	1	2	2	1	1	1
	GCA_024714615.1	1	2	1	1	1	1	3	1	1	1	1	1	1	1	1	1	1	1	1	2	1	1	1	1	1	1	2	1	1	1	1	1	3	1	1	1	1	3	2	1	2	1	1	2	2	1	1	1
	GCA_024714635.1	1	2	1	1	1	1	3	1	1	1	1	1	1	1	1	1	1	1	1	2	1	1	1	1	1	1	2	1	1	1	1	1	3	1	1	1	1	3	2	1	2	1	1	2	2	1	1	1
	GCA_024714655.1	1	2	1	1	1	1	3	1	1	1	1	1	1	1	1	1	1	1	1	2	1	1	1	1	1	1	2	1	1	1	1	1	3	1	1	1	1	3	2	1	2	1	1	2	2	1	1	1
	GCA_024714665.1	1	2	1	1	1	1	3	1	1	1	1	1	1	1	1	1	1	1	1	2	1	1	1	1	1	1	2	1	1	1	1	1	3	1	1	1	1	3	2	1	2	1	1	2	2	1	1	1
	GCA_024714695.1	1	2	1	1	1	1	3	1	1	1	1	1	1	1	1	1	1	1	1	2	1	1	1	1	1	1	1	1	1	1	1	1	3	1	1	1	1	3	2	1	2	1	1	2	2	1	1	1
	GCA_024714715.1	2	2	1	1	1	1	3	1	1	1	1	1	1	1	1	1	1	1	1	2	1	1	1	1	1	1	1	1	1	1	1	1	3	1	1	1	1	3	2	1	2	1	1	2	2	1	1	1
	GCA_024714735.1	1	2	1	1	1	1	3	1	1	1	1	1	1	1	1	1	1	1	1	2	1	1	1	1	1	1	1	1	1	1	1	1	3	1	1	1	1	3	2	1	2	1	1	2	2	1	1	1
	GCA_024714755.1	1	2	1	1	1	1	3	1	1	1	1	1	1	1	1	1	1	1	1	2	1	1	1	1	1	1	1	1	1	1	1	1	3	1	1	2	1	3	2	1	2	1	1	2	2	1	1	1
	GCA_024714765.1	5	2	1	1	1	1	3	1	1	1	1	1	1	1	1	1	1	1	1	2	1	1	1	1	1	1	1	1	1	1	1	1	3	1	1	1	1	3	2	1	2	1	1	2	2	1	1	1
	GCA_024714795.1	1	2	1	1	1	1	3	1	1	1	1	1	1	1	1	1	1	1	1	2	1	1	1	1	1	1	1	1	1	1	1	1	3	1	1	2	1	3	2	1	2	1	1	2	2	1	1	1
	GCA_024714815.1	1	2	1	1	1	1	3	1	1	1	1	1	1	1	1	1	1	1	1	2	1	1	1	1	1	1	2	1	1	1	1	1	3	1	1	1	1	3	1	1	2	1	1	2	2	1	1	1
	GCA_024714835.1	1	2	1	1	1	1	3	1	1	1	1	1	1	1	1	1	1	1	1	2	1	1	1	1	1	1	1	1	1	1	1	1	3	1	1	2	1	3	1	1	2	1	1	2	2	1	1	1
	GCA_024714845.1	1	2	1	1	1	1	3	1	1	1	1	1	1	1	1	1	1	1	1	2	1	1	1	1	1	1	2	1	1	1	1	1	3	1	1	2	1	3	1	1	2	1	1	2	2	1	1	1
	GCA_024714865.1	2	2	1	1	1	1	3	1	1	1	1	1	1	1	1	1	1	1	1	2	1	1	1	1	1	1	2	1	1	1	1	1	3	1	1	1	1	3	1	1	2	1	1	2	2	1	1	1
	GCA_024714895.1	2	2	1	1	1	1	3	1	1	1	1	1	1	1	1	1	1	1	1	2	1	1	1	1	1	1	2	1	1	1	1	1	3	1	1	2	1	3	1	1	2	1	1	2	2	1	1	1
	GCA_024714915.1	1	2	1	1	1	1	3	1	1	1	1	1	1	1	1	1	1	1	1	2	1	1	1	1	1	1	2	1	1	1	1	1	3	1	1	1	1	3	1	1	2	1	1	2	2	1	1	1
	GCA_024714935.1	1	2	1	1	1	1	3	1	1	1	1	1	1	1	1	1	1	1	1	2	1	1	1	1	1	1	2	1	1	1	1	1	3	1	1	1	1	3	1	1	2	1	1	2	2	1	1	1
	GCA_024714975.1	1	2	1	1	1	1	3	1	1	1	1	1	1	1	1	1	1	1	1	2	1	1	1	1	1	1	1	1	1	1	1	1	3	1	1	1	1	3	2	1	2	1	1	2	2	1	1	1
	GCA_024714985.1	2	2	1	1	1	1	3	1	1	1	1	1	1	1	1	1	1	1	1	2	1	1	1	1	1	1	1	1	1	1	1	1	3	1	1	1	1	3	2	1	2	1	1	2	2	1	1	1
	GCA_024715015.1	2	2	1	1	1	1	3	1	1	1	1	1	1	1	1	1	1	1	1	2	1	1	1	1	1	1	1	1	1	1	1	1	3	1	1	1	1	3	1	1	2	1	1	2	2	1	1	1
	GCA_024715035.1	5	2	1	1	1	1	3	1	1	1	1	1	1	1	1	1	1	1	1	2	1	1	1	1	1	1	1	1	1	1	1	1	3	1	1	1	1	3	2	1	2	1	1	2	2	1	1	1
	GCA_024715055.1	2	2	1	1	1	1	3	1	1	1	1	1	1	1	1	1	1	1	1	2	1	1	1	1	1	1	1	1	1	1	1	1	3	1	1	1	1	3	2	1	2	1	1	2	2	1	1	1
	GCA_024715075.1	1	2	1	1	1	1	3	1	1	1	1	1	1	1	1	1	1	1	1	2	1	1	1	1	1	1	1	1	1	1	1	1	3	1	1	1	1	3	2	1	2	1	1	2	2	1	1	1
	GCA_024715095.1	5	2	1	1	1	1	3	1	1	1	1	1	1	1	1	1	1	1	1	2	1	1	1	1	1	1	1	1	1	1	1	1	3	1	1	1	1	3	2	1	2	1	1	2	2	1	1	1
	GCA_024715115.1	1	2	1	1	1	1	3	1	1	1	1	1	1	1	1	1	1	1	1	2	1	1	1	1	1	1	2	1	1	1	1	1	3	1	1	2	1	3	2	1	2	1	1	2	2	1	1	1
	GCA_024715135.1	1	2	1	1	1	1	3	1	1	1	1	1	1	1	1	1	1	1	1	2	1	1	1	1	1	1	1	1	1	1	1	1	3	1	1	1	1	3	2	1	2	1	1	2	2	1	1	1
	GCA_024715145.1	1	2	1	1	1	1	3	1	1	1	1	1	1	1	1	1	1	1	1	2	1	1	1	1	1	1	2	1	1	1	1	1	3	1	1	1	1	3	2	1	2	1	1	2	2	1	1	1
	GCA_024715175.1	1	2	1	1	1	1	3	1	1	1	1	1	1	1	1	1	1	1	1	2	1	1	1	1	1	1	2	1	1	1	1	1	3	1	1	1	1	3	1	1	2	1	1	2	2	1	1	1
	GCA_024715195.1	1	2	1	1	1	1	3	1	1	1	1	1	1	1	1	1	1	1	1	2	1	1	1	1	1	1	2	1	1	1	1	1	3	1	1	1	1	3	2	1	2	1	1	2	2	1	1	1
	GCA_024715205.1	1	2	1	1	1	1	3	1	1	1	1	1	1	1	1	1	1	1	1	2	1	1	1	1	1	1	2	1	1	1	1	1	3	1	1	1	1	3	1	1	2	1	1	2	2	1	1	1
	GCA_024715215.1	2	2	1	1	1	1	3	1	1	1	1	1	1	1	1	1	1	1	1	2	1	1	1	1	1	1	2	1	1	1	1	1	3	1	1	2	1	3	2	1	2	1	1	2	2	1	1	1
	GCA_024715255.1	1	2	1	1	1	1	3	1	1	1	1	1	1	1	1	1	1	1	1	2	1	1	1	1	1	1	2	1	1	1	1	1	3	1	1	1	1	3	1	1	2	1	1	2	2	1	1	1
	GCA_024715295.1	1	2	1	1	1	1	3	1	1	1	1	1	1	1	1	1	1	1	1	2	1	1	1	1	1	1	2	1	1	1	1	1	3	1	1	1	1	3	1	1	2	1	1	2	2	1	1	1
	GCA_024715315.1	1	2	1	1	1	1	3	1	1	1	1	1	1	1	1	1	1	1	1	2	1	1	1	1	1	1	1	1	1	1	1	1	3	1	1	1	1	3	1	1	2	1	1	2	2	1	1	1
	GCA_024715325.1	5	2	1	1	1	1	3	1	1	1	1	1	1	1	1	1	1	1	1	2	1	1	1	1	1	1	1	1	1	1	1	1	3	1	1	1	1	3	1	1	2	1	1	2	2	1	1	1
	GCA_024715355.1	1	2	1	1	1	1	3	1	1	1	1	1	1	1	1	1	1	1	1	2	1	1	1	1	1	1	1	1	1	1	1	1	3	1	1	1	1	3	2	1	2	1	1	2	2	1	1	1
	GCA_024715365.1	1	2	1	1	1	1	3	1	1	1	1	1	1	1	1	1	1	1	1	2	1	1	1	1	1	1	2	1	1	1	1	1	3	1	1	1	1	3	1	1	2	1	1	2	2	1	1	1
	GCA_024715395.1	1	2	1	1	1	1	3	1	1	1	1	1	1	1	1	1	1	1	1	2	1	1	1	1	1	1	2	1	1	1	1	1	3	1	1	1	1	3	2	1	2	1	1	2	2	1	1	1
	GCA_024715415.1	1	2	1	1	1	1	3	1	1	1	1	1	1	1	1	1	1	1	1	2	1	1	1	1	1	1	2	1	1	1	1	1	3	1	1	1	1	3	2	1	2	1	1	2	2	1	1	1
	GCA_024715425.1	1	2	1	1	1	1	3	1	1	1	1	1	1	1	1	1	1	1	1	2	1	1	1	1	1	1	2	1	1	1	1	1	3	1	1	1	1	3	2	1	2	1	1	2	2	1	1	1
	GCA_024715455.1	1	2	1	1	1	1	3	1	1	1	1	1	1	1	1	1	1	1	1	2	1	1	1	1	1	1	2	1	1	1	1	1	3	1	1	1	1	3	2	1	2	1	1	2	2	1	1	1
	GCA_024715465.1	1	2	1	1	1	1	3	1	1	1	1	1	1	1	1	1	1	1	1	2	1	1	1	1	1	1	2	1	1	1	1	1	3	1	1	1	1	3	2	1	2	1	1	2	2	1	1	1
	GCA_024715495.1	1	2	1	1	1	1	3	1	1	1	1	1	1	1	1	1	1	1	1	2	1	1	1	1	1	1	2	1	1	1	1	1	3	1	1	2	1	3	2	1	2	1	1	2	2	1	1	1
	GCA_024715505.1	1	2	1	1	1	1	3	1	1	1	1	1	1	1	1	1	1	1	1	3	1	1	1	1	1	1	1	1	1	1	1	1	3	1	1	1	1	3	1	1	2	1	1	2	2	1	1	1
	GCA_024715515.1	1	2	1	1	1	1	3	1	1	1	1	1	1	1	1	1	1	1	1	2	1	1	1	1	1	1	1	1	1	1	1	1	3	1	1	1	1	3	1	1	2	1	1	2	2	1	1	1
	GCA_024715555.1	1	2	1	1	1	1	3	1	1	1	1	1	1	1	1	1	1	1	1	2	1	1	1	1	1	1	2	1	1	1	1	1	3	1	1	1	1	3	2	1	2	1	1	2	2	1	1	1
	GCA_024715565.1	1	2	1	1	1	1	3	1	1	1	1	1	1	1	1	1	1	1	1	2	1	1	1	1	1	1	2	1	1	1	1	1	3	1	1	2	1	3	2	1	2	1	1	2	2	1	1	1
	GCA_024715575.1	1	2	1	1	1	1	3	1	1	1	1	1	1	1	1	1	1	1	1	2	1	1	1	1	1	1	2	1	1	1	1	1	3	1	1	1	1	3	2	1	2	1	1	2	2	1	1	1
	GCA_024715615.1	1	2	1	1	1	1	3	1	1	1	1	1	1	1	1	1	1	1	1	2	1	1	1	1	1	1	2	1	1	1	1	1	3	1	1	2	1	3	2	1	2	1	1	2	2	1	1	1
	GCA_024715635.1	1	2	1	1	1	1	3	1	1	1	1	1	1	1	1	1	1	1	1	2	1	1	1	1	1	1	2	1	1	1	1	1	3	1	1	1	1	3	1	1	2	1	1	2	2	1	1	1
	GCA_024715655.1	1	2	1	1	1	1	3	1	1	1	1	1	1	1	1	1	1	1	1	2	1	1	1	1	1	1	2	1	1	1	1	1	3	1	1	1	1	3	2	1	2	1	1	2	2	1	1	1
	GCA_024715675.1	1	2	1	1	1	1	3	1	1	1	1	1	1	1	1	1	1	1	1	2	1	1	1	1	1	1	1	1	1	1	1	1	3	1	1	1	1	3	2	1	2	1	1	2	2	1	1	1
	GCA_024715695.1	1	2	1	1	1	1	3	1	1	1	1	1	1	1	1	1	1	1	1	2	1	1	1	1	1	1	1	1	1	1	1	1	3	1	1	1	1	3	2	1	2	1	1	2	2	1	1	1
	GCA_024715715.1	1	2	1	1	1	1	3	1	1	1	1	1	1	1	1	1	1	1	1	2	1	1	1	1	1	1	1	1	1	1	1	1	3	1	1	1	1	3	2	1	2	1	1	2	2	1	1	1
	GCA_024715725.1	1	2	1	1	1	1	3	1	1	1	1	1	1	1	1	1	1	1	1	2	1	1	1	1	1	1	1	1	1	1	1	1	3	1	1	1	1	3	2	1	2	1	1	2	2	1	1	1
	GCA_024715735.1	1	2	1	1	1	1	3	1	1	1	1	1	1	1	1	1	1	1	1	2	1	1	1	1	1	1	2	1	1	1	1	1	3	1	1	1	1	3	2	1	2	1	1	2	2	1	1	1
	GCA_024715775.1	1	2	1	1	1	1	3	1	1	1	1	1	1	1	1	1	1	1	1	2	1	1	1	1	1	1	2	1	1	1	1	1	3	1	1	1	1	3	2	1	2	1	1	2	2	1	1	1
	GCA_024715795.1	1	2	1	1	1	1	3	1	1	1	1	1	1	1	1	1	1	1	1	2	1	1	1	1	1	1	1	1	1	1	1	1	3	1	1	2	1	3	1	1	2	1	1	2	2	1	1	1
	GCA_024715815.1	1	2	1	1	1	1	3	1	1	1	1	1	1	1	1	1	1	1	1	2	1	1	1	1	1	1	2	1	1	1	1	1	3	1	1	2	1	3	2	1	2	1	1	2	2	1	1	1
	GCA_024715835.1	1	2	1	1	1	1	3	1	1	1	1	1	1	1	1	1	1	1	1	2	1	1	1	1	1	1	1	1	1	1	1	1	3	1	1	1	1	3	2	1	2	1	1	2	2	1	1	1
	GCA_024715845.1	1	2	1	1	1	1	3	1	1	1	1	1	1	1	1	1	1	1	1	2	1	1	1	1	1	1	2	1	1	1	1	1	3	1	1	1	1	3	2	1	2	1	1	2	2	1	1	1
	GCA_024715875.1	1	2	1	1	1	1	3	1	1	1	1	1	1	1	1	1	1	1	1	2	1	1	1	1	1	1	2	1	1	1	1	1	3	1	1	2	1	3	1	1	2	1	1	2	2	1	1	1
	GCA_024715895.1	1	2	1	1	1	1	3	1	1	1	1	1	1	1	1	1	1	1	1	2	1	1	1	1	1	1	2	1	1	1	1	1	3	1	1	1	1	3	2	1	2	1	1	2	2	1	1	1
	GCA_024715915.1	2	2	1	1	1	1	3	1	1	1	1	1	1	1	1	1	1	1	1	2	1	1	1	1	1	1	2	1	1	1	1	1	3	1	1	1	1	3	1	1	2	1	1	2	2	1	1	1
	GCA_024715925.1	1	2	1	1	1	1	3	1	1	1	1	1	1	1	1	1	1	1	1	2	1	1	1	1	1	1	1	1	1	1	1	1	3	1	1	1	1	3	1	1	2	1	1	2	2	1	1	1
	GCA_024715935.1	1	2	1	1	1	1	3	1	1	1	1	1	1	1	1	1	1	1	1	2	1	1	1	1	1	1	2	1	1	1	1	1	3	1	1	1	1	3	1	1	2	1	1	2	2	1	1	1
	GCA_024715975.1	1	2	1	1	1	1	3	1	1	1	1	1	1	1	1	1	1	1	1	2	1	1	1	1	1	1	2	1	1	1	1	1	3	1	1	2	1	3	2	1	2	1	1	2	2	1	1	1
	GCA_024715995.1	1	2	1	1	1	1	3	1	1	1	1	1	1	1	1	1	1	1	1	2	1	1	1	1	1	1	2	1	1	1	1	1	3	1	1	2	1	3	1	1	2	1	1	2	2	1	1	1
	GCA_024716015.1	1	2	1	1	1	1	3	1	1	1	1	1	1	1	1	1	1	1	1	2	1	1	1	1	1	1	2	1	1	1	1	2	3	1	1	2	1	3	1	1	2	1	1	2	2	1	1	1
	GCA_024716035.1	1	2	1	1	1	1	3	1	1	1	1	1	1	1	1	1	1	1	1	2	1	1	1	1	1	1	2	1	1	1	1	1	3	1	1	3	1	3	1	1	2	1	1	2	2	1	1	1
	GCA_024716055.1	1	2	1	1	1	1	3	1	1	1	1	1	1	1	1	1	1	1	1	2	1	1	1	1	1	1	2	1	1	1	1	1	4	1	1	1	1	3	1	1	2	1	1	2	2	1	1	1
	GCA_024716075.1	2	2	1	1	1	1	3	1	1	1	1	1	1	1	1	1	1	1	1	2	1	1	1	1	1	1	2	1	1	1	1	1	3	1	1	1	1	3	1	1	2	1	1	2	2	1	1	1
	GCA_024716095.1	1	2	1	1	1	1	3	1	1	1	1	1	1	1	1	1	1	1	1	2	1	1	1	1	1	1	1	1	1	1	1	1	3	1	1	1	1	3	2	1	2	1	1	2	2	1	1	1
	GCA_024716115.1	1	2	1	1	1	1	3	1	1	1	1	1	1	1	1	1	1	1	1	2	1	1	1	1	1	1	2	1	1	1	1	1	3	1	1	2	1	3	1	1	2	1	1	2	2	1	1	1
	GCA_024716135.1	1	2	1	1	1	1	3	1	1	1	1	1	1	1	1	1	1	1	1	2	1	1	1	1	1	1	2	1	1	1	1	1	3	1	1	1	1	3	1	1	2	1	1	2	2	1	1	1
	GCA_024716155.1	1	2	1	1	1	1	3	1	1	1	1	1	1	1	1	1	1	1	1	2	1	1	1	1	1	1	2	1	1	1	1	1	3	1	1	1	1	3	2	1	2	1	1	2	2	1	1	1
	GCA_024716175.1	1	2	1	1	1	1	3	1	1	1	1	1	1	1	1	1	1	1	1	2	1	1	1	1	1	1	2	1	1	1	1	1	3	1	1	1	1	3	1	1	2	1	1	2	2	1	1	1
	GCA_024716185.1	1	2	1	1	1	1	3	1	1	1	1	1	1	1	1	1	1	1	1	2	1	1	1	1	1	1	2	1	1	1	1	1	3	1	1	1	1	3	2	1	2	1	1	2	2	1	1	1
	GCA_024716215.1	1	2	1	1	1	1	3	1	1	1	1	1	1	1	1	1	1	1	1	2	1	1	1	1	1	1	2	1	1	1	1	1	3	1	1	2	1	3	2	1	2	1	1	2	2	1	1	1
	GCA_024716225.1	1	2	1	1	1	1	3	1	1	1	1	1	1	1	1	1	1	1	1	2	1	1	1	1	1	1	2	1	1	1	1	1	3	1	1	2	1	3	1	1	2	1	1	2	2	1	1	1
	GCA_024716255.1	1	2	1	1	1	1	3	1	1	1	1	1	1	1	1	1	1	1	1	2	1	1	1	1	1	1	2	1	1	1	1	1	3	1	1	1	1	3	1	1	2	1	1	2	2	1	1	2
	GCA_024716275.1	1	2	1	1	1	1	3	1	1	1	1	1	1	1	1	1	1	1	1	2	1	1	1	1	1	1	2	1	1	1	1	1	3	1	1	1	1	3	1	1	2	1	1	2	2	1	1	1
	GCA_024716295.1	1	2	1	1	1	1	3	1	1	1	1	1	1	1	1	1	1	1	1	2	1	1	1	1	1	1	1	1	1	1	1	1	3	1	1	1	1	3	1	1	2	1	1	2	2	1	1	1
	GCA_024716305.1	1	2	1	1	1	1	3	1	1	1	1	1	1	1	1	1	1	1	1	2	1	1	1	1	1	1	1	1	1	1	1	1	3	1	1	3	1	3	1	1	2	1	1	2	2	1	1	1
	GCA_024716335.1	1	2	1	1	1	1	3	1	1	1	1	1	1	1	1	1	1	1	1	2	1	1	1	1	1	1	2	1	1	1	1	1	3	1	1	2	1	3	2	1	2	1	1	2	2	1	1	1
	GCA_024716355.1	1	2	1	1	1	1	3	1	1	1	1	1	1	1	1	1	1	1	1	2	1	1	1	1	1	1	1	1	1	1	1	1	3	1	1	1	1	3	2	1	2	1	1	3	2	1	1	1
	GCA_024716375.1	1	2	1	1	1	1	3	1	1	1	1	1	1	1	1	1	1	1	1	2	1	1	1	1	1	1	2	1	1	1	1	1	3	1	1	2	1	3	2	1	2	1	1	2	2	1	1	1
	GCA_024716395.1	1	2	1	1	1	1	3	1	1	1	1	1	1	1	1	1	1	1	1	2	1	1	1	1	1	1	1	1	1	1	1	1	3	1	1	1	1	3	2	1	2	1	1	2	2	1	1	1
	GCA_024716405.1	1	2	1	1	1	1	3	1	1	1	1	1	1	1	1	1	1	1	1	2	1	1	1	1	1	1	1	1	1	1	1	1	3	1	1	1	1	3	1	1	2	1	1	2	2	1	1	1
	GCA_024716435.1	1	2	1	1	1	1	3	1	1	1	1	1	1	1	1	1	1	1	1	2	1	1	1	1	1	1	1	1	1	1	1	1	3	1	1	1	1	3	1	1	2	1	1	2	2	1	1	1
	GCA_024716455.1	1	2	1	1	1	1	3	1	1	1	1	1	1	1	1	1	1	1	1	2	1	1	1	1	1	1	2	1	1	1	1	1	3	1	1	1	1	3	2	1	2	1	1	2	2	1	1	1
	GCA_024716475.1	1	2	1	1	1	1	3	1	1	1	1	1	1	1	1	1	1	1	1	2	1	1	1	1	1	1	2	1	1	1	1	1	3	1	1	1	1	3	2	1	2	1	1	2	2	1	1	1
	GCA_024716515.1	1	2	1	1	1	1	3	1	1	1	1	1	1	1	1	1	1	1	1	2	1	1	1	2	1	1	2	1	1	1	1	1	3	1	1	1	1	3	2	1	2	1	1	2	2	1	1	1
	GCA_024716525.1	1	2	1	1	1	1	3	1	1	1	1	1	1	1	1	1	1	1	1	2	1	1	1	1	1	1	2	1	1	1	1	1	3	1	1	1	1	3	2	1	2	1	1	2	2	1	1	1
	GCA_024716555.1	1	2	1	1	1	1	3	1	1	1	1	1	1	1	1	1	1	1	1	2	1	1	1	1	1	1	2	1	1	1	1	1	3	1	1	2	1	3	2	1	2	1	1	2	2	1	1	1
	GCA_024716575.1	1	2	1	1	1	1	3	1	1	1	1	1	1	1	1	1	1	1	1	2	1	1	1	1	1	1	2	1	1	1	1	1	3	1	1	2	1	3	2	1	2	1	1	2	2	1	1	1
	GCA_024716595.1	1	2	1	1	1	1	3	1	1	1	1	1	1	1	1	1	1	1	1	2	1	1	1	1	1	1	2	1	1	1	1	1	3	1	1	2	1	3	1	1	2	1	1	2	2	1	1	1
	GCA_024716635.1	1	2	1	1	1	1	3	1	1	1	1	1	1	1	1	1	1	1	1	2	1	1	1	1	1	1	2	1	1	1	1	1	3	1	1	1	1	3	2	1	2	1	1	2	2	1	1	1
	GCA_024716645.1	1	2	1	1	1	1	3	1	1	1	1	1	1	1	1	1	1	1	1	2	1	1	1	1	1	1	1	1	1	1	1	1	3	1	1	1	1	3	2	1	2	1	1	2	2	1	1	1
	GCA_024716655.1	1	2	1	1	1	1	3	1	1	1	1	1	1	1	1	1	1	1	1	2	1	1	1	1	1	1	2	1	1	1	1	1	3	1	1	1	1	3	2	1	2	1	1	2	2	1	1	1
	GCA_024716685.1	1	2	1	1	1	1	3	1	1	1	1	1	1	1	1	1	1	1	1	2	1	1	1	1	1	1	2	1	1	1	1	1	3	1	1	1	1	3	2	1	2	1	1	2	2	1	1	1
	GCA_024716705.1	1	2	1	1	1	1	3	1	1	1	1	1	1	1	1	1	1	1	1	2	1	1	1	1	1	1	2	1	1	1	1	1	3	1	1	1	1	3	1	1	2	1	1	2	2	1	1	1
	GCA_024716735.1	1	2	1	1	1	1	3	1	1	1	1	1	1	1	1	1	1	1	1	2	1	1	1	1	1	1	2	1	1	1	1	1	3	1	1	1	1	3	1	1	2	1	1	2	2	1	1	1
	GCA_024716755.1	1	2	1	1	1	1	3	1	1	1	1	1	1	1	1	1	1	1	1	2	1	1	1	1	1	1	2	1	1	1	1	1	3	1	1	2	1	3	1	1	2	1	1	2	2	1	1	1
	GCA_024716765.1	2	2	1	1	1	1	3	1	1	1	1	1	1	1	1	1	1	1	1	2	1	1	1	1	1	1	1	1	1	1	1	1	3	1	1	1	1	3	2	1	2	1	1	2	2	1	1	1
	GCA_024716785.1	1	2	1	1	1	1	3	1	1	1	1	1	1	1	1	1	1	1	1	2	1	1	1	1	1	1	1	1	1	1	1	1	3	1	1	2	1	3	2	1	2	1	1	2	2	1	1	1
	GCA_024716815.1	1	2	1	1	1	1	3	1	1	1	1	1	1	1	1	1	1	1	1	2	1	1	1	1	1	1	1	1	1	1	1	1	3	1	1	1	1	3	2	1	2	1	1	2	2	1	1	1
	GCA_024716825.1	1	2	1	1	1	1	3	1	1	1	1	1	1	1	1	1	1	1	1	2	1	1	1	1	1	1	2	1	1	1	1	1	3	1	1	1	1	3	1	1	2	1	1	2	2	1	1	1
	GCA_024716855.1	1	2	1	1	1	1	3	1	1	1	1	1	1	1	1	1	1	1	1	2	1	1	1	1	1	1	1	1	1	1	1	1	3	1	1	2	1	3	1	1	2	1	1	2	2	1	1	1
	GCA_024716875.1	1	2	1	1	1	1	3	1	1	1	1	1	1	1	1	1	1	1	1	2	1	1	1	1	1	1	2	1	1	1	1	1	3	1	1	1	1	3	1	1	2	1	1	2	2	1	1	1
	GCA_024716895.1	1	2	1	1	1	1	3	1	1	1	1	1	1	1	1	1	1	1	1	2	1	1	1	1	1	1	2	1	1	1	1	1	3	1	1	1	1	3	1	1	2	1	1	2	2	1	1	1
	GCA_024716905.1	1	2	1	1	1	1	3	1	1	1	1	1	1	1	1	1	1	1	1	2	1	1	1	1	1	1	1	1	1	1	1	1	3	1	1	1	1	3	2	1	2	1	1	2	2	1	1	1
	GCA_024716935.1	1	2	1	1	1	1	3	1	1	1	1	1	1	1	1	1	1	1	1	2	1	1	1	1	1	1	2	1	1	1	1	1	3	1	1	2	1	3	1	1	2	1	1	2	2	1	1	1
	GCA_024716945.1	1	2	1	1	1	1	3	1	1	1	1	1	1	1	1	1	1	1	1	2	1	1	1	1	1	1	2	1	1	1	1	1	3	1	1	1	1	3	2	1	2	1	1	2	2	1	1	1
	GCA_024716975.1	1	2	1	1	1	1	3	1	1	1	1	1	1	1	1	1	1	1	1	2	1	1	1	1	1	1	1	1	1	1	1	1	3	1	1	1	1	3	1	1	2	1	1	2	2	1	1	1
	GCA_024716995.1	1	2	1	1	1	1	3	1	1	1	1	1	1	1	1	1	1	1	1	2	1	1	1	1	1	1	2	1	1	1	1	1	3	1	1	1	1	3	2	1	2	1	1	2	2	1	1	1
	GCA_024717015.1	1	2	1	1	1	1	3	1	1	1	1	1	1	1	1	1	1	1	1	2	1	1	1	1	1	1	2	1	1	1	1	1	3	1	1	2	1	3	1	1	2	1	1	2	2	1	1	1
	GCA_024717035.1	1	2	1	1	1	1	3	1	1	1	1	1	1	1	1	1	1	1	1	2	1	1	1	1	1	1	1	1	1	1	1	1	3	1	1	1	1	3	1	1	2	1	1	2	2	1	1	1
	GCA_024717055.1	1	2	1	1	1	1	3	1	1	1	1	1	1	1	1	1	1	1	1	2	1	1	1	1	1	1	2	1	1	1	1	1	3	1	1	1	1	3	1	1	2	1	1	2	2	1	1	1
	GCA_024717065.1	1	2	1	1	1	1	3	1	1	1	1	1	1	1	1	1	1	1	1	2	1	1	1	1	1	1	2	1	1	1	1	1	3	1	1	2	1	3	2	1	2	1	1	2	2	1	1	1
	GCA_024717075.1	1	2	1	1	1	1	3	1	1	1	1	1	1	1	1	1	1	1	1	2	1	1	1	1	1	1	1	1	1	1	1	1	3	1	1	2	1	3	1	1	2	1	1	2	2	1	1	1
	GCA_024717115.1	1	2	1	1	1	1	3	1	1	1	1	1	1	1	1	1	1	1	1	2	1	1	1	1	1	1	2	1	1	1	1	1	3	1	1	2	1	3	2	1	2	1	1	2	2	1	1	1
	GCA_024717125.1	1	2	1	1	1	1	3	1	1	1	1	1	1	1	1	1	1	1	1	2	1	1	1	1	1	1	1	1	1	1	1	1	3	1	1	3	1	3	2	1	2	1	1	2	2	1	1	1
	GCA_024717155.1	1	2	1	1	1	1	3	1	1	1	1	1	1	1	1	1	1	1	1	2	1	1	1	1	1	1	2	1	1	1	1	1	3	1	1	1	1	3	2	1	2	1	1	2	2	1	1	1
	GCA_024717175.1	1	2	1	1	1	1	3	1	1	1	1	1	1	1	1	1	1	1	1	2	1	1	1	1	1	1	1	1	1	1	1	1	3	1	1	2	1	3	2	1	2	1	1	2	2	1	1	1
	GCA_024717195.1	1	2	1	1	1	1	3	1	1	1	1	1	1	1	1	1	1	1	1	2	1	1	1	1	1	1	1	1	1	1	1	1	3	1	1	1	1	3	1	1	2	1	1	2	2	1	1	1
	GCA_024717215.1	1	2	1	1	1	1	3	1	1	1	1	1	1	1	1	1	1	1	1	2	1	1	1	1	1	2	1	1	1	1	1	1	3	1	1	2	1	3	2	1	2	1	1	2	2	1	1	1
	GCA_024717235.1	1	2	1	1	1	1	3	1	1	1	1	1	1	1	1	1	1	1	1	2	1	1	1	1	1	1	1	1	1	1	1	1	3	1	1	2	1	3	2	1	2	1	1	2	2	1	1	1
	GCA_024717255.1	1	2	1	1	1	1	3	1	1	1	1	1	1	1	1	1	1	1	1	2	1	1	1	1	1	1	2	1	1	1	1	1	3	1	1	1	1	3	2	1	2	1	1	2	2	1	1	1
	GCA_024717285.1	1	2	1	1	1	1	3	1	1	1	1	1	1	1	1	1	1	1	1	2	1	1	1	1	1	1	1	1	1	1	1	1	3	1	1	1	1	3	1	1	2	1	1	2	2	1	1	1
	GCA_024717315.1	1	2	1	1	1	1	3	1	1	1	1	1	1	1	1	1	1	1	1	2	1	1	1	1	1	1	1	1	1	1	1	1	3	1	1	1	1	3	1	1	2	1	1	2	2	1	1	1
	GCA_024717345.1	1	2	1	1	1	1	3	1	1	1	1	1	1	1	1	1	1	1	1	2	1	1	1	1	1	1	1	1	1	1	1	1	3	1	1	2	1	3	2	1	2	1	1	2	2	1	1	1
	GCA_024717375.1	5	2	1	1	1	1	3	1	1	1	1	1	1	1	1	1	1	1	1	2	1	1	1	1	1	1	1	1	1	1	1	1	3	1	1	1	1	3	2	1	3	1	1	2	2	1	1	1
	GCA_024717415.1	1	2	1	1	1	1	3	1	1	1	1	1	1	1	1	1	1	1	1	2	1	1	1	1	1	1	1	1	1	1	1	1	3	1	1	1	1	3	2	1	2	1	1	2	2	1	1	1
	GCA_024717435.1	1	2	1	1	1	1	3	1	1	1	1	1	1	1	1	1	1	1	1	2	1	1	1	1	1	1	2	1	1	1	1	1	3	1	1	1	1	3	2	1	2	1	1	2	2	1	1	1
	GCA_024718565.1	1	2	1	1	1	1	3	1	1	1	1	1	1	1	1	1	1	1	1	2	1	1	1	1	1	1	2	1	1	1	1	1	3	1	1	1	1	3	2	1	2	1	1	2	2	1	1	1
	GCA_024718625.1	1	2	1	1	1	1	3	1	1	1	1	1	1	1	1	1	1	1	1	2	1	1	1	1	1	1	2	1	1	1	1	1	3	1	1	2	1	3	2	1	2	1	1	2	2	1	1	1
	GCA_024718655.1	1	2	1	1	1	1	3	1	1	1	1	1	1	1	1	1	1	1	1	2	1	1	1	1	1	1	2	1	1	1	1	1	3	1	1	1	1	3	2	1	2	1	1	2	2	1	1	1
	GCA_024718675.1	1	2	1	1	1	1	3	1	1	1	1	1	1	1	1	1	1	1	1	2	1	1	1	1	1	1	1	1	1	1	1	1	3	1	1	2	1	3	2	1	2	1	1	2	2	1	1	1
	GCA_024718695.1	1	2	1	1	1	1	3	1	1	1	1	1	1	1	1	1	1	1	1	2	1	1	1	1	1	1	2	1	1	1	1	1	3	1	1	2	1	3	2	1	2	1	1	2	2	1	1	1
	GCA_024718715.1	1	2	1	1	1	1	3	1	1	1	1	1	1	1	1	1	1	1	1	2	1	1	1	1	1	1	1	1	1	1	1	1	3	1	1	1	1	3	2	1	2	1	1	2	2	1	1	1
	GCA_024718735.1	1	2	1	1	1	1	3	1	1	1	1	1	1	1	1	1	1	1	1	2	1	1	1	1	1	1	2	1	1	1	1	1	3	1	1	1	1	3	1	1	2	1	1	2	2	1	1	1
	GCA_024718755.1	1	2	1	1	1	1	3	1	1	1	1	1	1	1	1	1	1	1	1	2	1	1	1	1	1	1	1	1	1	1	1	1	3	1	1	2	1	3	2	1	2	1	1	2	2	1	1	1
	GCA_024718775.1	1	2	1	1	1	1	3	1	1	1	1	2	1	1	1	1	1	1	1	2	1	1	1	1	1	1	2	1	1	1	1	1	3	1	1	1	1	3	2	1	2	1	1	2	2	1	1	1
	GCA_024718795.1	1	2	1	1	1	1	3	1	1	1	1	1	1	1	1	1	1	1	1	2	1	1	1	1	1	1	2	1	1	1	1	1	3	1	1	2	1	3	2	1	2	1	1	2	2	1	1	1
	GCA_024718815.1	1	2	1	1	1	1	3	1	1	1	1	1	1	1	1	1	1	1	1	2	1	1	1	1	1	1	2	1	1	1	1	1	3	1	1	2	1	3	2	1	2	1	1	2	2	1	1	1
	GCA_024718835.1	1	2	1	1	1	1	3	1	1	1	1	1	1	1	1	1	1	1	1	2	1	1	1	1	1	1	2	1	1	1	1	1	3	1	1	1	1	3	2	1	2	1	1	2	2	1	1	1
	GCA_024718855.1	1	2	1	1	1	1	3	1	1	1	1	1	1	1	1	1	1	1	1	2	1	1	1	1	1	1	2	1	1	1	1	1	3	1	1	2	1	3	2	1	2	1	1	2	2	1	1	1
	GCA_024718885.1	1	2	1	1	1	1	3	1	1	1	1	1	1	1	1	1	1	1	1	2	1	1	1	1	1	1	2	1	1	1	1	1	3	1	1	2	1	3	2	1	2	1	1	2	2	1	1	1
	GCA_024718935.1	1	2	1	1	1	1	3	1	1	1	1	1	1	1	1	1	1	1	1	2	1	1	1	1	1	1	2	1	1	1	1	1	3	1	1	1	1	3	2	1	2	1	1	2	2	1	1	1
	GCA_024718985.1	1	2	1	1	1	1	3	1	1	1	1	1	1	1	1	1	1	1	1	2	1	1	1	1	1	1	1	1	1	1	1	1	3	1	1	1	1	3	2	1	2	1	1	2	2	1	1	1
	GCA_024719005.1	1	2	1	1	1	1	3	1	1	1	1	1	1	1	1	1	1	1	1	2	1	1	1	1	1	1	1	1	1	1	1	1	3	1	1	1	1	3	2	1	2	1	1	2	2	1	1	1
	GCA_024719045.1	1	2	1	1	1	1	3	1	1	1	1	1	1	1	1	1	1	1	1	2	1	1	1	1	1	1	1	1	1	1	1	1	3	1	1	2	1	3	1	1	2	1	1	2	2	1	1	1
	GCA_024719065.1	1	2	1	1	1	1	3	1	1	1	1	1	1	1	1	1	1	1	1	2	1	1	1	1	1	1	1	1	1	1	1	1	3	1	1	1	1	3	2	1	2	1	1	2	2	1	1	1
	GCA_024719085.1	5	2	1	1	1	1	3	1	1	1	1	1	1	1	1	1	1	1	1	2	1	1	1	1	1	1	1	1	1	1	1	1	3	1	1	1	1	3	2	1	2	1	1	2	2	1	1	1
	GCA_024719195.1	1	2	1	1	1	1	3	1	1	1	1	1	1	1	1	1	1	1	1	2	1	1	1	1	1	1	2	1	1	1	1	1	3	1	1	2	1	3	2	1	2	1	1	2	2	1	1	1
	GCA_024719275.1	1	2	1	1	1	1	3	1	1	1	1	1	1	1	1	1	1	1	1	2	1	1	1	1	1	1	2	1	1	1	1	1	3	1	1	2	1	3	2	1	2	1	1	2	2	1	1	1
	GCA_024719315.1	1	2	1	1	1	1	3	1	1	1	1	1	1	1	1	1	1	1	1	2	1	1	1	1	1	1	2	1	1	1	1	1	3	1	1	2	1	3	2	1	2	1	1	2	2	1	1	1
	GCA_024719375.1	1	2	1	1	1	1	3	1	1	1	1	1	1	1	1	1	1	1	1	2	1	1	1	1	1	1	2	1	1	1	1	1	3	1	1	1	1	3	2	1	2	1	1	2	2	1	1	1
	GCA_024719405.1	1	2	1	1	1	1	3	1	1	1	1	1	1	1	1	1	1	1	1	2	1	1	1	1	1	2	2	1	1	1	1	1	3	1	1	2	1	3	2	1	2	1	1	2	2	1	1	1
	GCA_024719455.1	1	2	1	1	1	1	3	1	1	1	1	1	1	1	1	1	1	1	1	2	1	1	1	1	1	1	1	1	1	1	1	1	3	1	1	2	1	3	2	1	2	1	1	2	2	1	1	1
	GCA_024719475.1	1	2	1	1	1	1	3	1	1	1	1	1	1	1	1	1	1	1	1	2	1	1	1	1	1	1	2	1	1	1	1	1	3	1	1	2	1	3	2	1	2	1	1	2	2	1	1	1
	GCA_024719515.1	1	2	1	1	1	1	3	1	1	1	1	1	1	1	1	1	1	1	1	2	1	1	1	1	1	1	2	1	1	1	1	1	3	1	1	1	1	3	2	1	2	1	1	2	2	1	1	1
	GCA_024719575.1	1	2	1	1	1	1	3	1	1	1	1	1	1	1	1	1	1	1	1	2	1	1	1	1	1	1	1	1	1	1	1	1	3	1	1	1	1	3	2	1	2	1	1	2	2	1	1	1
	GCA_024719585.1	1	2	1	1	1	1	3	1	1	1	1	1	1	1	1	1	1	1	1	2	1	1	1	1	1	1	2	1	1	1	1	1	3	1	1	1	1	3	2	1	2	1	1	2	2	1	1	1
	GCA_024719655.1	1	2	1	1	1	1	3	1	1	1	1	1	1	1	1	1	1	1	1	2	1	1	1	1	1	1	1	1	1	1	1	1	3	1	1	1	1	3	2	1	2	1	1	2	2	1	1	1
	GCA_024719675.1	1	2	1	1	1	1	3	1	1	1	1	1	1	1	1	1	1	1	1	2	1	1	1	1	1	1	2	1	1	1	1	1	3	1	1	1	1	3	2	1	2	1	1	2	2	1	1	1
	GCA_024719735.1	1	2	1	1	1	1	3	1	1	1	1	1	1	1	1	1	1	1	1	3	1	1	1	1	1	1	2	1	1	1	1	1	3	1	1	1	1	3	2	1	2	1	1	2	2	1	1	1
	GCA_024719775.1	1	2	1	1	1	1	3	1	1	1	1	1	1	1	1	1	1	1	1	2	1	1	1	1	1	1	1	1	1	1	1	1	3	1	1	1	1	3	2	1	2	1	1	2	2	1	1	1
	GCA_024719795.1	2	2	1	1	1	1	3	1	1	1	1	1	1	1	1	1	1	1	1	2	1	1	1	1	1	1	2	1	1	1	1	1	3	1	1	1	1	3	2	1	2	1	1	2	2	1	1	1
	GCA_024719815.1	1	2	1	1	1	1	3	1	1	1	1	1	1	1	1	1	1	1	1	2	1	1	1	1	1	1	2	1	1	1	1	1	3	1	1	2	1	3	2	1	2	1	1	2	2	1	1	1
	GCA_024719845.1	1	2	1	1	1	1	3	1	1	1	1	1	1	1	1	1	1	1	1	2	1	1	1	1	1	1	2	1	1	1	1	1	3	1	1	1	1	3	2	1	2	1	1	2	2	1	1	1
	GCA_024719875.1	1	2	1	1	1	1	3	1	1	1	1	1	1	1	1	1	1	1	1	2	1	1	1	1	1	1	2	1	1	1	1	1	3	1	1	2	1	3	2	1	2	1	1	2	2	1	1	1
	GCA_024719895.1	1	2	1	1	1	1	3	1	1	1	1	1	1	1	1	1	1	1	1	2	1	1	1	1	1	1	2	1	1	1	1	1	3	1	1	1	1	3	2	1	2	1	1	2	2	1	1	1
	GCA_024719915.1	1	2	1	1	1	1	3	1	1	1	1	1	1	1	1	1	1	1	1	2	1	1	1	1	1	1	1	1	1	1	1	1	3	1	1	1	1	3	2	1	2	1	1	2	2	1	1	1
	GCA_024719925.1	1	2	1	1	1	1	3	1	1	1	1	1	1	1	1	1	1	1	1	2	1	1	1	1	1	1	2	1	1	1	1	1	3	1	1	1	1	3	2	1	2	1	1	2	2	1	1	1
	GCA_024719935.1	1	2	1	1	1	1	3	1	1	1	1	1	1	1	1	1	1	1	1	2	1	1	1	1	1	1	1	1	1	1	1	1	3	1	1	1	1	3	2	1	2	1	1	2	2	1	1	1
	GCA_024719975.1	1	2	1	1	1	1	3	1	1	1	1	1	1	1	1	1	1	1	1	2	1	1	1	1	1	1	1	1	1	1	1	1	3	1	1	1	1	3	2	1	2	1	1	2	2	1	1	1
	GCA_024719995.1	1	2	1	1	1	1	3	1	1	1	1	1	1	1	1	1	1	1	1	2	1	1	1	1	1	1	1	1	1	1	1	1	3	1	1	2	1	3	2	1	2	1	1	2	2	1	1	1
	GCA_024720015.1	1	2	1	1	1	1	3	1	1	1	1	1	1	1	1	1	1	1	1	2	1	1	1	1	1	1	1	1	1	1	1	1	3	1	1	1	1	3	2	1	2	1	1	2	2	1	1	1
	GCA_024720035.1	1	2	1	1	1	1	3	1	1	1	1	1	1	1	1	1	1	1	1	2	1	1	1	1	1	1	2	1	1	1	1	1	3	1	1	2	1	3	2	1	2	1	1	2	2	1	1	1
	GCA_024720065.1	1	2	1	1	1	1	3	1	1	1	1	1	1	1	1	1	1	1	1	2	1	1	1	1	1	1	2	1	1	1	1	1	3	1	1	2	1	3	2	1	2	1	1	2	2	1	1	1
	GCA_024720095.1	1	2	1	1	1	1	3	1	1	1	1	1	1	1	1	1	1	1	1	2	1	1	1	1	1	1	1	1	1	1	1	1	3	1	1	2	1	3	2	1	2	1	1	2	2	1	1	1
	GCA_024720115.1	5	2	1	1	1	1	3	1	1	1	1	1	1	1	1	1	1	1	1	2	1	1	1	1	1	1	1	1	1	1	1	1	3	1	1	1	1	3	2	1	2	1	1	2	2	1	1	1
	GCA_024720135.1	1	2	1	1	1	1	3	1	1	1	1	1	1	1	1	1	1	1	1	2	1	1	1	1	1	1	2	1	1	1	1	1	3	1	1	2	1	3	2	1	2	1	1	2	2	1	1	1
	GCA_024720165.1	1	2	1	1	1	1	3	1	1	1	1	1	1	1	1	1	1	1	1	2	1	1	1	1	1	1	2	1	1	1	1	1	3	1	1	1	1	3	2	1	2	1	1	2	2	1	1	1
	GCA_024720195.1	1	2	1	1	1	1	3	1	1	1	1	1	1	1	1	1	1	1	1	2	1	1	1	1	1	1	2	1	1	1	1	1	3	1	1	1	1	3	2	1	2	1	1	2	2	1	1	1
	GCA_024720215.1	1	2	1	1	1	1	3	1	1	1	1	1	1	1	1	1	1	1	1	2	1	1	1	1	1	1	2	1	1	1	1	1	3	1	1	1	1	3	2	1	2	1	1	2	2	1	1	1
	GCA_024720275.1	1	2	1	1	1	1	3	1	1	1	1	1	1	1	1	1	1	1	1	2	1	1	1	1	1	1	2	1	1	1	1	1	3	1	1	1	1	3	2	1	2	1	1	2	2	1	1	1
	GCA_024720315.1	1	2	1	1	1	1	3	1	1	1	1	1	1	1	1	1	1	1	1	2	1	1	1	1	1	1	2	1	1	1	1	1	3	1	1	1	1	3	2	1	2	1	1	2	2	1	1	1
	GCA_024720325.1	1	2	1	1	1	1	3	1	1	1	1	1	1	1	1	1	1	1	1	2	1	1	1	1	1	1	2	1	1	1	1	1	3	1	1	1	1	3	2	1	2	1	1	2	2	1	1	1
	GCA_024720355.1	1	2	1	1	1	1	3	1	1	1	1	1	1	1	1	1	1	1	1	2	1	1	1	1	1	1	1	1	1	1	1	1	3	1	1	1	1	3	2	1	2	1	1	2	2	1	1	1
	GCA_024720415.1	1	2	1	1	1	1	3	1	1	1	1	1	1	1	1	1	1	1	1	2	1	1	1	1	1	1	2	1	1	1	1	1	3	1	1	2	1	3	1	1	2	1	1	2	2	1	1	1
	GCA_024720435.1	1	2	1	1	1	1	3	1	1	1	1	1	1	1	1	1	1	1	1	2	1	1	1	1	1	1	2	1	1	1	1	1	3	1	1	2	1	3	2	1	2	1	1	2	2	1	1	1
	GCA_024720475.1	1	2	1	1	1	1	3	1	1	1	1	1	1	1	1	1	1	1	1	2	1	1	1	1	1	1	2	1	1	1	1	1	3	1	1	2	1	3	2	1	2	1	1	2	2	1	1	1
	GCA_024720485.1	1	2	1	1	1	1	3	1	1	1	1	1	1	1	1	1	1	1	1	2	1	1	1	1	1	1	1	1	1	1	1	1	3	1	1	1	1	3	2	1	2	1	1	2	2	1	1	1
	GCA_024720515.1	1	2	1	1	1	1	3	1	1	1	1	1	1	1	1	1	1	1	1	2	1	1	1	1	1	1	1	1	1	1	1	1	3	1	1	2	1	3	2	1	2	1	1	2	2	1	1	1
	GCA_024720525.1	1	2	1	1	1	1	3	1	1	1	1	1	1	1	1	1	1	1	1	2	1	1	1	1	1	1	2	1	1	1	1	1	3	1	1	1	1	3	2	1	2	1	1	2	2	1	1	1
	GCA_024720555.1	1	2	1	1	1	1	3	1	1	1	1	1	1	1	1	1	1	1	1	3	1	1	1	1	1	1	2	1	1	1	1	1	3	1	1	1	1	3	2	1	2	1	1	2	2	1	1	1
	GCA_024720595.1	1	2	1	1	1	1	3	1	1	1	1	1	1	1	1	1	1	1	1	2	1	1	1	1	1	1	1	1	1	1	1	1	3	1	1	1	1	3	2	1	2	1	1	2	2	1	1	1
	GCA_024720615.1	1	2	1	1	1	1	3	1	1	1	1	1	1	1	1	1	1	1	1	2	1	1	1	1	1	1	2	1	1	1	1	1	3	1	1	1	1	3	2	1	2	1	1	2	2	1	1	1
	GCA_024720655.1	1	2	1	1	1	1	3	1	1	1	1	1	1	1	1	1	1	1	1	2	1	1	1	1	1	1	1	1	1	1	1	1	3	1	1	1	1	3	2	1	2	1	1	2	2	1	1	1
	GCA_024720695.1	1	2	1	1	1	1	3	1	1	1	1	1	1	1	1	1	1	1	1	2	1	1	1	1	1	1	2	1	1	1	1	1	3	1	1	2	1	3	2	1	2	1	1	2	2	1	1	1
	GCA_024720715.1	1	2	1	1	1	1	3	1	1	1	1	1	1	1	1	1	1	1	1	2	1	1	1	1	1	1	2	1	1	1	1	1	3	1	1	2	1	3	2	1	2	1	1	2	2	1	1	1
	GCA_024720725.1	1	2	1	1	1	1	3	1	1	1	1	1	1	1	1	1	1	1	1	2	1	1	1	1	1	1	2	1	1	1	1	1	3	1	1	2	1	3	2	1	2	1	1	2	2	1	1	1
	GCA_024734795.1	2	2	1	1	1	1	4	1	1	1	1	1	1	1	1	1	1	1	1	2	1	1	2	1	1	1	1	1	1	1	1	1	3	1	1	1	1	3	2	1	2	1	1	2	2	1	1	1
	GCA_024734815.1	2	2	1	1	1	1	3	1	1	1	1	1	1	1	1	1	1	1	1	2	1	1	1	1	1	1	1	1	1	1	1	1	3	1	1	1	1	3	2	1	2	2	1	2	2	1	1	1
	GCA_026337635.1	1	2	1	1	1	1	3	1	1	1	1	1	1	1	1	1	1	1	1	2	1	1	1	1	1	1	1	1	1	1	1	1	3	1	1	1	1	3	2	1	2	2	1	2	2	1	1	1
	GCA_026337675.1	1	2	1	1	1	1	3	1	1	1	1	1	1	1	1	1	1	1	1	2	1	1	1	1	1	1	1	1	1	1	1	1	3	1	1	1	1	3	2	1	2	2	1	2	2	1	1	1
	GCA_029568485.1	4	2	1	1	1	1	4	1	1	1	1	1	1	1	1	1	1	1	1	2	1	1	1	1	1	1	1	1	1	1	1	1	3	1	1	1	1	4	2	1	2	2	1	2	2	1	1	1
	GCA_029622995.1	2	2	1	1	1	1	4	1	1	1	1	1	1	1	1	1	1	1	1	2	1	1	1	1	1	1	1	1	1	1	1	1	3	1	1	1	1	3	1	1	2	2	1	2	2	1	1	1
	GCA_029635925.2	2	3	1	1	1	1	4	1	1	1	1	1	1	1	1	1	1	1	1	2	1	1	3	1	1	1	1	1	1	1	1	1	3	1	1	1	1	3	1	1	2	1	1	2	2	1	1	1
	GCA_029635965.2	2	3	1	1	1	1	5	1	1	1	1	1	1	1	1	1	1	1	1	2	1	1	3	1	1	1	1	1	1	1	1	1	3	1	1	1	1	3	1	1	2	1	1	2	2	1	1	1
	GCA_029635985.1	3	3	1	1	1	1	5	1	1	1	1	1	1	1	1	1	1	1	1	2	1	1	3	1	1	1	1	1	1	1	1	1	3	1	1	1	1	3	1	1	2	1	1	2	2	1	1	1
	GCA_029636025.2	4	2	1	1	1	1	3	1	1	1	1	1	1	1	1	1	1	1	1	2	1	1	1	1	1	1	1	1	1	1	1	1	3	1	1	1	1	3	2	1	2	2	1	2	2	1	1	1
	GCA_030253475.1	2	3	1	1	1	1	3	1	1	1	1	1	1	1	1	1	1	1	1	2	1	1	2	1	1	1	1	1	1	1	1	1	3	1	1	1	1	3	2	1	2	1	1	2	2	1	1	1
	GCA_030504675.1	3	2	1	1	1	1	4	1	1	1	1	1	1	1	1	1	1	1	1	2	1	1	2	1	1	1	1	1	1	1	1	1	3	1	1	1	1	3	3	1	2	1	1	2	2	1	1	1
	GCA_030504695.1	2	2	1	1	1	1	4	1	1	1	1	1	1	1	1	1	1	1	1	2	1	1	2	1	1	1	1	1	1	1	1	1	3	1	1	1	1	3	3	1	2	1	1	2	2	1	1	1
	GCA_032329515.2	2	2	1	1	1	1	4	1	1	1	1	1	1	1	1	1	1	1	1	2	1	1	1	1	1	1	1	1	1	1	1	1	3	1	1	1	1	3	1	1	2	2	1	2	2	1	1	1
	GCA_032335095.2	3	2	1	1	1	1	5	1	1	1	1	1	1	1	1	1	1	1	1	3	1	1	3	1	1	1	1	1	1	1	1	1	3	1	1	1	1	3	2	1	2	1	1	2	2	1	1	1
	GCA_000937465.2	2	2	1	1	1	1	4	1	1	1	1	1	1	1	1	1	1	1	1	2	1	1	2	1	1	1	1	1	1	1	1	1	3	1	1	1	1	3	2	1	2	1	1	2	2	1	1	1
	GCA_000937495.2	2	2	1	1	1	1	3	1	1	1	1	1	1	1	1	1	1	1	1	2	1	1	1	1	1	1	1	1	1	1	1	1	3	1	1	1	1	3	1	1	2	2	1	2	2	1	1	1
	GCA_001874795.1	2	2	1	1	1	1	3	1	1	1	1	1	1	1	1	1	1	1	1	2	1	1	1	2	2	2	2	1	1	1	1	1	3	1	1	1	1	3	2	1	2	2	1	2	2	1	1	1
	GCA_001874805.1	2	3	1	1	1	1	4	1	1	1	1	1	1	1	1	1	1	1	1	2	1	1	2	2	2	2	2	1	1	1	1	1	3	1	1	1	1	3	2	1	2	1	1	2	3	1	1	1
	GCA_001874955.1	2	2	1	1	1	1	3	1	1	1	1	1	1	1	1	2	1	1	1	3	1	1	1	1	1	1	1	1	2	1	0	0	2	0	0	1	1	2	4	0	2	2	1	2	2	1	1	1
	GCA_001874975.1	2	3	1	1	1	1	4	1	2	1	1	1	1	1	1	1	1	1	1	2	1	1	2	2	2	2	2	1	1	1	1	1	3	1	1	1	1	3	2	1	2	1	1	2	3	1	1	1
	GCA_001875165.1	2	2	1	1	1	1	3	1	1	1	1	1	1	1	1	1	1	1	1	2	1	1	1	2	2	2	2	1	1	1	1	1	3	1	1	1	1	3	2	1	2	2	1	2	2	1	1	1
	GCA_001875185.1	2	2	1	1	1	1	3	1	1	1	1	1	1	1	1	1	1	1	1	2	1	1	1	1	1	1	1	1	1	1	1	1	3	1	1	1	1	3	2	1	2	2	1	2	2	1	1	1
	GCA_001875205.1	2	2	1	1	1	1	4	1	1	1	1	1	1	1	1	1	1	1	1	2	1	1	1	2	2	2	2	1	1	1	1	1	3	1	1	1	1	3	2	1	2	1	1	2	2	1	1	1
	GCA_001875215.1	2	2	1	1	1	1	3	1	1	1	1	1	1	1	1	1	1	1	1	2	1	1	1	1	1	1	1	1	1	1	1	1	3	1	1	1	1	3	2	1	2	1	1	2	2	1	1	1
	GCA_002968515.1	2	2	1	1	1	1	3	1	1	1	1	1	1	1	1	1	1	1	1	2	1	1	1	1	1	1	1	1	1	1	1	1	3	1	1	1	1	3	2	1	2	1	1	2	2	1	1	1
	GCA_002968585.1	2	3	1	1	1	1	4	1	1	1	1	1	1	1	1	1	1	1	1	2	1	1	2	2	2	2	2	1	1	1	1	1	3	1	1	1	1	3	2	1	2	1	1	2	3	1	1	1
	GCA_002968655.1	2	2	1	1	1	1	4	1	1	1	1	1	1	1	1	1	1	1	1	2	1	1	2	2	2	2	2	1	1	1	1	1	3	1	1	1	1	3	2	1	2	1	1	2	2	1	1	1
	GCA_002968695.1	2	2	1	1	1	1	3	1	1	1	1	1	1	1	1	1	1	1	1	2	1	1	1	1	1	1	1	1	1	1	1	1	3	1	1	1	1	3	2	1	2	1	1	2	2	1	1	1
	GCA_002968955.1	2	3	1	1	1	1	4	1	1	1	1	1	1	1	1	1	1	1	1	2	1	1	2	2	2	2	2	1	1	1	1	1	3	1	1	1	1	3	2	1	2	1	1	2	3	1	1	1
	GCA_003000655.1	2	2	1	1	1	1	4	1	1	1	1	1	1	1	1	1	1	1	1	2	1	1	2	2	2	2	2	1	1	1	1	1	3	1	1	1	1	3	2	1	2	1	1	2	2	1	1	1
	GCA_003000695.1	2	2	1	1	1	1	3	1	1	1	1	1	1	1	1	1	1	1	1	2	1	1	1	1	1	1	1	1	1	1	1	1	3	1	1	1	1	3	2	1	2	1	1	2	2	1	1	1
	GCA_003000755.1	2	2	1	1	1	1	3	1	1	1	1	1	1	1	1	1	1	1	1	2	1	1	1	2	2	2	2	1	1	1	1	1	3	1	1	1	1	3	2	1	2	2	1	2	2	1	1	1
	GCA_003000795.1	2	2	1	1	1	1	3	1	1	1	1	1	1	1	1	1	1	1	1	2	1	1	1	1	1	1	1	1	1	1	1	1	3	1	1	1	1	3	2	1	2	2	1	2	2	1	1	1
	GCA_003073615.1	2	2	1	1	1	1	3	1	1	1	1	1	1	1	1	1	1	1	1	2	1	1	1	1	1	1	1	1	1	1	1	1	3	1	1	1	1	3	2	1	2	1	1	2	2	1	1	1
	GCA_003073735.1	2	2	1	1	1	1	3	1	1	1	1	1	1	1	1	1	1	1	1	2	1	1	1	2	2	2	2	1	1	1	1	1	3	1	1	1	1	3	2	1	2	2	1	2	2	1	1	1
	GCA_003073795.1	2	2	1	1	1	1	3	1	1	1	1	1	1	1	1	1	1	1	1	2	1	1	1	2	2	2	2	1	1	1	1	1	3	1	1	1	1	3	2	1	2	2	1	2	2	1	1	1
	GCA_003073895.1	2	2	1	1	1	1	4	1	1	1	1	1	1	1	1	1	1	1	1	2	1	1	1	1	1	1	1	1	1	1	1	1	3	1	1	1	1	3	2	1	2	1	1	2	2	1	1	1
	GCA_003074095.1	2	2	1	1	1	1	4	1	1	1	1	1	1	1	1	1	1	1	1	2	1	1	2	2	2	2	2	1	1	1	1	1	3	1	1	1	1	3	2	1	2	1	1	2	2	1	1	1
	GCA_003074115.1	2	2	1	1	1	1	4	1	1	1	1	1	1	1	1	1	1	1	1	2	1	1	2	2	2	2	2	1	1	1	1	1	3	1	1	1	1	3	1	1	2	1	1	2	2	1	1	1
	GCA_003193645.1	2	2	1	1	1	1	3	1	1	1	1	1	1	1	1	1	1	1	1	2	1	1	2	1	1	1	1	1	1	1	1	1	3	1	1	1	1	3	1	1	2	2	1	2	2	1	1	1
	GCA_003194245.1	2	2	1	1	1	1	3	1	1	1	1	1	1	1	1	1	1	1	1	2	1	1	1	1	1	1	1	1	1	1	1	1	3	1	1	1	1	3	2	1	2	2	1	2	2	1	1	1
	GCA_003204335.1	1	2	1	1	1	1	2	1	1	1	1	1	1	1	1	1	1	1	1	2	1	1	1	1	1	1	1	1	1	1	1	1	3	1	1	1	1	3	2	1	2	1	1	2	2	1	1	1
	GCA_003288335.1	2	2	1	1	1	1	3	1	1	1	1	1	1	1	2	1	1	1	1	2	1	1	1	1	1	1	1	1	1	1	1	1	3	1	1	1	1	3	2	1	2	1	1	2	2	1	1	1
	GCA_003288355.1	2	2	1	1	1	1	3	1	1	1	1	1	1	1	1	1	1	1	1	2	1	1	2	1	1	1	1	1	1	1	1	2	2	1	1	1	1	3	1	1	2	1	1	2	2	1	1	1
	GCA_003324255.1	2	2	1	1	1	1	4	1	1	1	1	1	1	1	1	1	1	1	1	2	1	1	2	1	1	1	1	1	0	1	1	1	3	1	1	1	1	3	2	1	2	1	1	2	2	1	1	1
	GCA_003324275.1	2	3	1	1	1	1	4	1	1	1	1	1	1	1	1	1	1	1	1	2	1	1	2	2	2	2	2	1	1	1	1	1	3	1	1	1	1	3	2	1	2	1	1	2	2	1	1	1
	GCA_003324295.1	2	3	1	1	1	1	4	1	1	1	1	1	1	1	1	1	1	1	1	2	1	1	2	2	2	2	2	1	1	1	1	1	3	1	1	1	1	3	2	1	2	1	1	2	3	1	1	1
	GCA_003324385.1	2	2	1	1	1	1	4	1	1	1	1	1	1	1	1	1	1	1	1	2	1	1	2	2	2	2	2	1	1	1	1	1	3	1	1	1	1	3	1	1	2	1	1	2	2	1	1	1
	GCA_003324405.1	2	2	1	1	1	1	3	1	1	1	1	1	1	1	1	1	1	1	1	2	1	1	1	1	1	1	1	1	1	1	1	1	3	1	1	1	1	3	2	1	2	2	1	2	2	1	1	1
	GCA_003324465.1	2	2	1	1	1	1	3	1	1	1	1	1	1	1	1	1	1	1	1	2	1	1	1	1	1	1	1	1	1	1	1	1	3	1	1	1	1	3	2	1	2	2	1	2	2	1	1	1
	GCA_003571805.1	1	2	1	1	1	1	3	1	1	1	1	1	1	1	1	1	1	1	1	2	1	1	1	1	1	1	1	1	1	1	1	1	3	1	1	1	1	3	2	1	2	1	1	2	2	1	1	1
	GCA_003968015.1	1	2	1	1	1	1	3	1	1	1	1	1	1	1	1	1	1	1	1	2	1	1	1	1	1	1	1	1	1	1	1	1	3	1	1	1	1	3	2	1	2	2	1	2	3	1	1	1
	GCA_003968025.1	1	2	1	1	1	1	2	1	1	1	1	1	1	1	1	1	1	1	1	2	1	1	1	1	1	1	2	1	1	1	1	1	3	1	1	2	1	3	2	1	2	2	1	2	2	1	1	1
	GCA_003968035.1	2	2	1	1	1	1	3	1	1	1	1	1	1	1	1	1	1	1	1	2	1	1	1	1	1	1	1	1	1	1	1	1	3	1	1	1	1	3	1	1	2	2	1	2	2	1	1	1
	GCA_003968045.1	3	3	1	1	1	1	4	1	1	1	1	1	1	1	1	1	1	1	1	2	1	1	2	1	1	1	2	1	1	1	1	1	3	1	1	1	1	3	1	1	2	1	1	2	2	1	1	1
	GCA_003968055.1	3	2	1	1	1	1	4	1	1	1	1	1	1	1	1	1	1	1	1	2	1	1	2	1	1	1	1	1	1	1	1	1	3	1	1	1	1	3	2	1	2	1	1	2	2	1	1	1
	GCA_003968115.1	1	2	1	1	1	1	3	1	1	1	1	1	1	1	1	1	1	1	1	2	1	1	1	1	1	1	1	1	1	1	1	1	3	1	1	1	1	3	2	1	2	2	1	2	2	1	1	1
	GCA_003968125.1	3	2	1	1	1	1	3	1	1	1	1	1	1	1	1	1	1	1	1	2	1	1	1	1	1	1	1	1	1	1	1	1	3	1	1	1	1	3	1	1	2	2	1	2	2	1	1	1
	GCA_003968135.1	3	2	1	1	1	1	3	1	1	1	1	1	1	1	1	1	1	1	1	2	1	1	1	1	1	1	1	1	1	1	1	1	3	1	1	1	1	3	2	1	2	2	1	2	2	1	1	1
	GCA_003968155.1	1	2	1	1	1	1	2	1	1	1	1	1	1	1	1	1	1	1	1	2	1	1	3	1	1	1	1	1	1	1	1	1	3	1	1	1	1	3	1	1	2	2	1	2	2	1	1	1
	GCA_003968165.1	3	3	1	1	1	1	4	1	1	1	1	1	1	1	1	1	1	1	1	2	1	1	2	2	2	2	2	1	1	1	1	1	3	1	1	1	1	3	2	1	2	1	1	2	3	1	1	1
	GCA_003968215.1	5	2	1	1	1	1	3	1	1	1	1	1	1	1	1	1	1	1	1	2	1	1	1	1	1	1	2	1	1	1	1	1	3	1	1	2	1	3	1	1	2	2	1	2	2	1	1	1
	GCA_003968225.1	3	3	1	1	1	1	4	1	1	1	1	1	1	1	1	1	1	1	1	2	1	1	2	2	2	2	2	1	1	1	1	1	3	1	1	1	1	3	2	1	2	1	1	2	2	1	1	1
	GCA_003968235.1	1	3	1	1	1	1	4	1	1	1	1	1	1	1	1	1	1	1	1	2	1	1	2	2	2	2	2	1	1	1	1	1	3	1	1	1	1	3	2	1	2	1	1	2	3	1	1	1
	GCA_003968275.1	1	2	1	1	1	1	3	1	1	1	1	1	1	1	1	1	1	1	1	2	1	1	1	1	1	1	1	1	1	1	1	1	3	1	1	1	1	3	2	1	2	1	1	2	2	1	1	1
	GCA_003968295.1	3	3	1	1	1	1	4	1	1	1	1	1	1	1	1	1	1	1	1	2	1	1	2	1	1	1	1	1	1	1	1	1	3	1	1	1	1	3	2	1	2	1	1	2	3	1	1	1
	GCA_003968315.1	3	2	1	1	1	1	3	1	1	1	1	1	1	1	1	1	1	1	1	2	1	1	1	1	1	1	1	1	1	1	1	1	3	1	1	1	1	3	2	1	2	1	1	2	2	1	1	1
	GCA_003968385.1	1	2	1	1	1	1	3	1	1	1	1	1	1	1	1	1	1	1	1	2	1	1	2	1	1	1	2	1	1	1	1	1	3	1	1	1	1	3	2	1	2	1	1	2	2	1	1	1
	GCA_003968395.1	1	2	1	1	1	1	3	1	1	1	1	1	1	1	1	1	1	1	1	2	1	1	1	1	1	1	1	1	1	1	1	1	3	1	1	2	1	3	3	1	2	2	1	2	2	1	1	1
	GCA_003968425.1	5	2	1	1	1	1	4	1	1	1	1	1	1	1	1	1	1	1	1	2	1	1	1	2	2	2	2	1	1	1	1	1	3	1	1	1	1	4	2	1	2	1	1	2	2	1	1	1
	GCA_003968495.1	5	2	1	1	1	1	4	1	1	1	1	1	1	1	1	1	1	1	1	2	1	1	2	1	1	1	2	1	1	1	1	1	3	1	1	1	1	3	2	1	2	1	1	2	2	1	1	1
	GCA_003968535.1	3	2	1	1	1	1	3	1	1	1	1	1	1	1	1	1	1	1	1	2	1	1	1	1	1	1	2	1	1	1	1	1	3	1	1	1	1	3	2	1	2	2	1	2	2	1	1	1
	GCA_003968585.1	5	2	1	1	1	1	3	1	1	1	1	1	1	1	1	1	1	1	1	2	1	1	1	1	1	1	1	1	1	1	1	1	3	1	1	1	1	3	2	1	2	1	1	2	2	1	1	1
	GCA_003968895.1	5	2	1	1	1	1	3	1	1	1	0	1	1	1	1	1	1	1	1	2	1	1	2	1	1	1	1	1	1	1	1	1	3	1	1	1	1	3	1	1	2	1	1	2	2	1	1	1
	GCA_003968955.1	3	2	1	1	1	1	3	1	1	1	1	1	1	1	1	1	1	1	1	2	1	1	1	1	1	1	1	1	1	1	1	1	3	1	1	1	1	3	2	1	2	1	1	2	2	1	1	1
	GCA_003969035.1	5	2	1	1	1	1	4	1	1	1	1	1	1	1	1	1	1	1	1	2	1	1	1	1	1	1	1	1	1	1	1	1	3	1	1	1	1	3	2	1	2	2	1	2	2	1	1	1
	GCA_003969055.1	1	2	1	1	1	1	3	1	1	1	1	1	1	1	1	1	1	1	1	2	1	1	1	2	2	2	3	1	1	1	1	1	3	1	1	1	1	3	2	1	2	2	1	2	2	1	1	1
	GCA_003969095.1	1	2	1	1	1	1	3	1	1	1	1	1	1	1	1	1	1	2	1	2	1	1	1	2	2	2	3	1	1	1	1	1	3	1	1	2	1	3	2	1	2	1	1	2	2	1	1	1
	GCA_003969105.1	1	2	1	1	1	1	4	1	1	1	1	1	1	1	1	1	1	1	1	2	1	1	2	1	1	1	1	1	1	1	1	1	3	1	1	2	1	3	2	1	2	1	1	2	2	1	1	1
	GCA_003969175.1	1	2	1	1	1	1	4	1	1	1	1	1	1	1	1	1	1	1	1	2	1	1	1	2	2	2	3	1	1	1	1	1	3	1	1	2	1	3	2	1	2	1	2	2	2	1	1	1
	GCA_003969225.1	2	2	1	1	1	1	3	1	1	1	1	1	1	1	1	1	1	1	1	2	1	1	1	1	1	1	1	1	1	1	1	1	3	1	1	1	1	3	2	1	2	2	1	2	2	1	1	1
	GCA_003969295.1	3	2	1	1	1	1	4	1	1	1	1	1	1	1	1	1	1	1	1	2	1	1	2	2	2	2	2	1	1	1	1	1	3	1	1	1	1	3	2	1	2	1	1	2	2	1	1	1
	GCA_003969305.1	1	2	1	1	1	1	3	1	1	1	1	1	1	1	1	1	1	1	1	2	1	1	1	1	1	1	2	1	1	1	1	1	3	1	1	1	1	3	1	1	2	1	1	2	2	1	1	1
	GCA_003969475.1	2	3	1	1	1	1	3	1	1	1	1	1	1	1	1	1	1	1	1	2	1	1	1	1	1	1	1	1	1	1	1	1	3	1	1	1	1	3	3	1	2	2	1	2	2	1	1	1
	GCA_003969485.1	1	3	1	1	1	1	4	1	1	1	1	1	1	1	1	1	1	1	1	2	1	1	2	2	2	2	3	1	1	1	1	1	3	1	1	2	1	3	2	1	2	1	1	2	3	1	1	1
	GCA_003969495.1	1	3	1	1	1	1	3	1	1	1	1	1	1	1	1	1	1	1	1	2	1	1	1	1	1	1	1	1	1	2	1	1	3	1	1	1	1	4	2	1	2	2	1	2	2	1	1	1
	GCA_003969575.1	3	2	1	1	1	1	4	1	1	1	1	1	1	1	1	1	1	1	1	2	1	1	2	1	1	1	2	1	1	1	1	1	3	1	1	2	1	3	2	1	2	1	1	2	2	1	1	1
	GCA_003969645.1	1	2	1	1	1	1	3	1	1	1	1	1	1	1	1	1	1	1	1	2	1	1	1	1	1	1	1	1	1	1	1	1	3	1	1	1	1	3	2	1	2	1	1	2	2	1	1	1
	GCA_003969655.1	3	2	1	1	1	1	4	1	1	1	1	1	1	1	1	1	1	1	1	2	1	1	1	1	1	1	1	1	1	1	1	1	3	1	1	1	1	3	2	1	2	1	1	2	2	1	1	1
	GCA_003969695.1	5	2	1	1	1	1	3	1	1	1	1	1	1	1	1	1	1	1	1	2	1	1	1	2	2	2	2	1	1	1	1	1	3	1	1	1	1	3	2	1	2	1	1	2	2	1	1	1
	GCA_003969715.1	1	2	1	1	1	1	3	1	1	1	1	1	1	1	1	1	1	1	1	2	1	1	1	1	1	1	2	1	1	1	1	1	3	1	1	1	1	3	2	1	2	1	1	2	2	1	1	1
	GCA_003969735.1	1	2	1	1	1	1	4	1	1	1	1	1	1	1	1	1	1	1	1	2	1	1	2	1	1	1	1	1	1	1	1	1	3	1	1	1	1	3	2	1	2	1	1	2	3	1	1	1
	GCA_003969775.1	2	2	1	1	1	1	3	1	1	1	1	1	1	1	1	1	1	1	1	2	1	1	1	1	1	1	2	1	1	1	1	1	3	1	1	2	1	3	2	1	2	2	1	2	2	1	1	1
	GCA_003969795.1	5	2	1	1	1	1	3	1	1	1	1	1	1	1	1	1	1	1	1	2	1	1	2	1	1	1	2	1	1	1	1	1	3	1	1	2	1	3	2	1	2	1	1	2	2	1	1	1
	GCA_003969855.1	5	2	1	1	1	1	4	1	1	1	1	1	1	1	1	1	1	1	1	2	1	1	2	2	2	2	3	1	1	1	1	1	3	1	1	1	1	3	2	1	2	1	1	2	2	1	1	1
	GCA_003969865.1	5	2	1	1	1	1	3	1	1	1	1	1	1	1	1	1	1	1	1	2	1	1	1	1	1	1	1	1	1	1	1	1	3	1	1	1	1	3	2	1	2	2	1	2	2	1	1	1
	GCA_003969875.1	3	2	1	1	1	1	4	1	1	1	1	1	1	1	1	1	1	1	1	2	1	1	2	1	1	1	2	1	1	1	1	1	3	1	1	1	1	3	2	1	2	1	1	2	3	1	1	1
	GCA_003969885.1	3	2	1	1	1	1	3	1	1	1	1	1	1	1	1	1	1	1	1	2	1	1	1	1	1	1	2	1	1	1	1	1	3	1	1	2	1	3	2	1	2	1	1	2	2	1	1	1
	GCA_003969915.1	1	2	1	1	1	1	3	1	1	1	1	1	1	1	1	1	1	1	1	2	1	1	1	1	1	1	2	1	1	1	1	1	3	1	1	1	1	3	2	1	2	1	1	2	2	1	1	1
	GCA_003969955.1	3	3	1	1	1	1	3	1	1	1	1	1	1	1	1	1	1	1	1	2	1	1	2	1	1	1	2	1	1	1	1	1	3	1	1	2	1	3	1	1	2	1	1	2	2	1	1	1
	GCA_003969965.1	1	2	1	1	1	1	3	1	1	1	1	1	1	1	1	1	1	1	1	2	1	1	1	1	1	1	1	1	1	1	1	1	3	1	1	1	1	3	1	1	2	2	1	2	2	1	1	1
	GCA_003970005.1	1	2	1	1	1	1	3	1	1	1	1	1	1	1	1	1	1	1	1	2	1	1	1	1	1	1	1	1	1	1	1	1	3	1	1	1	1	3	2	1	2	1	1	3	2	1	1	1
	GCA_003970065.1	1	2	1	1	1	1	3	1	1	1	1	1	1	1	1	1	1	1	1	2	1	1	1	1	1	1	2	1	1	1	1	1	3	1	1	2	1	3	1	1	2	2	1	2	2	1	1	1
	GCA_003970615.1	1	2	1	1	1	1	3	1	1	1	1	1	1	1	1	1	1	1	1	2	1	1	1	1	1	1	2	1	1	1	1	1	3	1	1	2	1	3	2	1	2	1	1	2	2	1	1	1
	GCA_003970625.1	1	2	1	1	1	1	3	1	1	1	1	1	1	1	1	1	1	1	1	2	1	1	1	1	1	1	2	1	1	1	1	1	3	1	1	2	1	3	2	1	2	1	1	2	2	1	1	1
	GCA_003977955.1	1	2	1	1	2	1	3	1	1	1	1	1	1	1	1	1	1	1	1	2	1	1	2	1	1	1	1	1	1	1	1	1	3	2	1	1	1	3	1	1	2	2	1	2	3	1	1	1
	GCA_003977995.1	2	3	1	1	1	1	4	1	1	1	1	1	1	1	1	1	1	1	1	2	1	1	2	1	1	1	1	1	1	1	1	1	3	1	1	1	1	3	1	1	2	1	1	2	2	1	1	1
	GCA_007566955.1	3	2	1	1	1	1	3	1	1	1	1	1	1	1	1	1	1	1	1	2	1	1	1	1	1	1	1	1	1	1	1	1	3	1	1	1	1	3	1	1	2	2	1	2	2	1	1	1
	GCA_016905405.1	3	2	1	1	1	1	4	1	1	1	1	1	1	1	1	1	1	1	1	2	1	1	1	1	1	1	1	1	1	1	1	1	3	1	1	1	1	3	2	1	2	2	1	2	2	1	1	1
	GCA_019740495.1	1	2	1	1	1	1	4	1	1	1	1	1	1	1	1	1	1	1	1	2	1	1	2	2	2	2	3	1	1	1	1	1	3	1	1	1	1	3	2	1	2	1	1	2	2	1	1	1
	GCA_019915465.1	2	2	1	1	1	1	4	1	1	1	1	1	1	1	1	1	1	1	1	2	1	1	2	2	2	2	2	1	1	1	1	1	3	1	1	1	1	3	2	1	2	1	1	2	2	1	1	1
[truncated: 4,316 more columns]
