# Supplementary material for: Direct prediction of antimicrobial resistance in Pseudomonas aeruginosa by metagenomic next-generation sequencing
Source: Front Microbiol. 2024 Jun 6;15:1413434. doi: 10.3389/fmicb.2024.1413434 (PMC11187003; doi:10.3389/fmicb.2024.1413434)
Supplement: SUPPLEMENTARY TABLE S3 — The AMR-associated genes with q < 0.05 for the IPM, MEM, TZP, and LVFX resistance of P. aeruginosa. [file Table_3.XLSX]

## Sheet: Sheet1
	IPM	MPM	TZP	LVFX
	aadA4	aadA4	actP	aadA4
	ada	apt	ada	ackA
	batE	batE	alaS2	acoA
	beeE	beeE	aldH	adh
	bla	bfrD_2	benF	alpA
	capD	bla	capB	apt
	capF	capD	cinA	argG
	cdaR	capF	clpP	arsB
	cicA	cdaR	clsB	arsC
	copA	cicA	cysK	arsC1
	cpaF	cpaF	dhaT	arsH
	cro	cro	ectB	atsA
	cusA	dctM	ethA	batE
	cusB	dnaC	fdh	bedC1
	czcB	dotA	fimA	beeE
	czcC	endA	fimB	bfrD_2
	dctM	feoC	fliY_2	bla
	dotA	folP	gbsA	cadA
	feoC	ftsH1	glgA	capD
	flgK	glxK	glgB	capF
	folP	HA62_05660	glgE	ccoN
	ftsH1	helC	glgP	cdaR
	gbsA	hss	glgX	CI
	glxK	intE	glnP	cicA
	HA62_05660	istB	gltJ	copC
	helC	istB3	HA62_05660	copR
	hss	IV01_13290	hcnA	cro
	iamA	ltrA	hcnB	csy1
	ibrB	MA20_14610	hcnC	csy2
	intE	MA20_25305	ibrB	csy3
	IV01_13290	MA20_25550	istB3	csy4
	kipI	mdcH	katE	dctM
	leuO	merA	kipI	dnaB
	lipR	merD	ku	dnaC
	MA20_08125	merE	lamB	dotA
	MA20_25550	merF	leuO	endA
	merA	merP	ligD	fabH
	merD	merR	lipR	fhaB
	merE	mntH	MA20_15120	fhuE5
	merP	mod_1	MA20_16375	flgK
	merR	msi109	MA20_16485	folP
	merT	mucD	MA20_16685	ftsH1
	mlaE_1	nahR	MA20_25305	glxK
	mmlH	norM	malQ	HA62_05660
	mntH	oprD	merA	hcnA
	mod_1	parA	merP	hcnB
	msi109	phaD	mmlH	hcnC
	mucD	radC	moeB	hecA2
	nahR	resA	mprF	helC
	norM	rhsA	mrkB	hisJ
	parA	sca1	pdxA	hsdR
	prhI	soxR	prhI	hss
	radC	spoIVA	prpR	inrR
	shlA	stiP	prr	insN
	stiP	terA	puuP3	intE
	strB	terB	rhmD	istB
	sugE	terC	rhmT	IV01_13290
	terA	terD	sod22	K
	terB	terE	spoIVA	lbgB
	terC	terZ	spxB	ldhA
	terZ	tetR	stbC	lemA
	tetR	tniA	stbD	ligA
	tniA	tniB	tctA	lspA
	tniB	tniQ	treS	ltrA
	tniQ	tniR	treY	MA20_14610
	tniR	tnpA1	treZ	MA20_25305
	tnpA3	tnpS	wcaB	MA20_28790
	tnpS	traF	ybdK	MA20_38050
	topB	traG	ybdN	maa
	traF	traI	ybgK	merA
	traG	traJ	ybhP	merD
	traI	trbB	ydhM	merE
	traR	trbC	yebS	merF
	trbB	trbD	yebT	merP
	trbC	trbE	yedA	merR
	trbD	trbF	yfgF	merT
	trbE	trbG	yfjR	mntH
	trbF	trbI	ymdF	mod_1
	trbG	trbJ	yncB	mucD
	trbI	trbL	ywnB	norM
	trbJ	uspA		nuoL
	trbL	VV2343		nylB
	uspA	wxcB		oprB
	virD4	X4hbD		oprI
	VV2343	xisC		pdp
	wcaI	ybaR1		phaD
	wecB	ydbM		phnW
	wxcB	yesJ		pilL
	xisC			pphA
	ybdN			ppk2
	ybgK			preA
	yesJ			radC
	yfgF			resA
				rfbE
				rhsA
				rmuC
				romA
				sca1
				sdrA
				serB
				shlA
				soj
				soxR
				spoIVA
				ssb1
				stiP
				terA
				terB
				terC
				terD
				terE
				terZ
				tniA
				tniB
				tniQ
				tniR
				tnpA1
				tnpS
				topB
				tssI
				uspA
				virD4
				viuB_2
				VV2343
				wcaI
				wecB
				wxcB
				X4hbD
				xerD
				xisC
				yaaW
				yagK
				ybaR1
				ydbM
				yesJ
				yfeX
				yhcS
				yscN
				Z012_08985
				zntR
