# Supplementary material for: Direct prediction of antimicrobial resistance in Pseudomonas aeruginosa by metagenomic next-generation sequencing
Source: Front Microbiol. 2024 Jun 6;15:1413434. doi: 10.3389/fmicb.2024.1413434 (PMC11187003; doi:10.3389/fmicb.2024.1413434)
Supplement: SUPPLEMENTARY TABLE S4 — The common AMR-associated genes in four antibiotics. [file Table_4.XLSX]

## Sheet: vennData
	IPM	MPM	TZP	LVFX	IPM|MPM	IPM|TZP	IPM|LVFX	MPM|TZP	MPM|LVFX	TZP|LVFX	IPM|MPM|LVFX	MPM|TZP|LVFX	IPM|MPM|TZP|LVFX
	copA	mdcH	actP	ackA	cpaF	ada	flgK	istB3	apt	hcnA	aadA4	MA20_25305	HA62_05660
	cusA	oprD	alaS2	acoA	feoC	gbsA	merT		bfrD_2	hcnB	batE	spoIVA	merA
	cusB	traJ	aldH	adh	MA20_25550	ibrB	shlA		dnaC	hcnC	beeE		merP
	czcB		benF	alpA	msi109	kipI	topB		endA		bla
	czcC		capB	argG	nahR	leuO	virD4		istB		capD
	iamA		cinA	arsB	parA	lipR	wcaI		ltrA		capF
	MA20_08125		clpP	arsC	tetR	mmlH	wecB		MA20_14610		cdaR
	mlaE_1		clsB	arsC1	traF	prhI			merF		cicA
	strB		cysK	arsH	traG	ybdN			phaD		cro
	sugE		dhaT	atsA	traI	ybgK			resA		dctM
	tnpA3		ectB	bedC1	trbB	yfgF			rhsA		dotA
	traR		ethA	cadA	trbC				sca1		folP
			fdh	ccoN	trbD				soxR		ftsH1
			fimA	CI	trbE				terD		glxK
			fimB	copC	trbF				terE		helC
			fliY_2	copR	trbG				tnpA1		hss
			glgA	csy1	trbI				X4hbD		intE
			glgB	csy2	trbJ				ybaR1		IV01_13290
			glgE	csy3	trbL				ydbM		merD
			glgP	csy4							merE
			glgX	dnaB							merR
			glnP	fabH							mntH
			gltJ	fhaB							mod_1
			katE	fhuE5							mucD
			ku	hecA2							norM
			lamB	hisJ							radC
			ligD	hsdR							stiP
			MA20_15120	inrR							terA
			MA20_16375	insN							terB
			MA20_16485	K							terC
			MA20_16685	lbgB							terZ
			malQ	ldhA							tniA
			moeB	lemA							tniB
			mprF	ligA							tniQ
			mrkB	lspA							tniR
			pdxA	MA20_28790							tnpS
			prpR	MA20_38050							uspA
			prr	maa							VV2343
			puuP3	nuoL							wxcB
			rhmD	nylB							xisC
			rhmT	oprB							yesJ
			sod22	oprI
			spxB	pdp
			stbC	phnW
			stbD	pilL
			tctA	pphA
			treS	ppk2
			treY	preA
			treZ	rfbE
			wcaB	rmuC
			ybdK	romA
			ybhP	sdrA
			ydhM	serB
			yebS	soj
			yebT	ssb1
			yedA	tssI
			yfjR	viuB_2
			ymdF	xerD
			yncB	yaaW
			ywnB	yagK
				yfeX
				yhcS
				yscN
				Z012_08985
				zntR
