# Supplementary material for: Direct prediction of antimicrobial resistance in Pseudomonas aeruginosa by metagenomic next-generation sequencing
Source: Front Microbiol. 2024 Jun 6;15:1413434. doi: 10.3389/fmicb.2024.1413434 (PMC11187003; doi:10.3389/fmicb.2024.1413434)
Supplement: SUPPLEMENTARY TABLE S5 — Top 20 AMR-associated genes with the highest contribution to the models for the IPM, MEM, TZP, and LVFX resistance of P. aeruginosa. [file Table_5.XLSX]

## Sheet: Sheet1
	TZP	IPM	LVFX	MEM
	yebS	mmlH	hisJ	radC
	ymdF	radC	cadA	parA
	stbD	shlA	lbgB	tniR
	hcnA	tniQ	hsdR	aadA4
	ydhM	HA62_05660	bedC1	norM
	yfjR	cicA	fabH	endA
	clsB	uspA	copR	tniQ
	puuP3	IV01_13290	soxR	HA62_05660
	yedA	merE	arsB	merE
	moeB	feoC	hecA2	soxR
	katE	iamA	adh	ftsH1
	mmlH	wecB	rmuC	uspA
	MA20_16685	ybdN	lspA	cicA
	sod22	norM	csy1	rhsA
	MA20_16375	traF	wcaI	mdcH
	treS	tnpA3	arsH	glxK
	MA20_16485	MA20_08125	hcnC	apt
	hcnB	virD4	insN	bfrD_2
	spxB	lipR	phnW	trbC
	prhI	tniB	bla	tniA
